# Supplementary material
Source: MDPI journal article supplement (https://www.mdpi.com/2227-9717/9/9/1637)

## SUPPLEMENTARY MATERIALS

### Novel correlations between spectroscopic and morphological properties of activated carbons from waste coffee grounds

*Egle Rosson, Paolo Sgarbossa, Mirto Mozzon, Federico Venturino, Sara Bogialli, Antonella Glisenti, Aldo Talon, Elisa Moretti, Sara Carturan, Sergio Tamburini, Alessia Famengo, Ana Paula da Costa Ribeiro, Sadjia Benhabiles, Rida Kamel, Federico Zorzi, and Roberta Bertani\**

List of supplementary Figures and Tables:

- **Figure S1.** ESEM data of the starting SCGs.
- **Figure S2.** GC MS analysis of the EtOH mother liquors after washing spent coffee grounds from Arabica.
- **Figure S3. (a)**  $^{13}\text{C}$  HPDEC NMR spectrum in the solid state of caffeine. **(b):**  $^{13}\text{C}$  HPDEC NMR in the solid state of R and A samples.
- **Table S1:**  $^{13}\text{C}$  MAS Chemical shifts.
- **Figure S4.** TG and DTG profiles of R and A under air.
- **Table S2:** TG and DTG data of samples A, R, A/KOH, and R/KOH 1/1 mixtures in the range 30-1000°C under nitrogen.
- **Figure S5. (a).** GC MS analysis of the acetone solution of the residue after treatment at 380°C for 6 h under nitrogen of a 1:1 mixture A:KOH. **(b).** ESEM images of the black powder recovered from treatment at 380°C for 6 h under nitrogen of a 1:1 mixture A:KOH.
- **Figure S6.** Raman spectra of the prepared activated carbons.
- **Figure S7.** XRD spectra.
- **Figure S8.** XPS spectra: (a) C 1s signal; (b) O 1s signal; (c) N 1s signal.
- **Table S3.** Parameters obtained from fitting two Gaussians as G and D bands to the Raman spectra of the ACs samples.
- **Table S4.** Parameters in ACs samples obtained from fitting four Gaussians G1, G2, D1 and D2 to the Raman spectra in the region 1000-1600  $\text{cm}^{-1}$ .
- **Table S5.** Parameters in ACs samples obtained from fitting four Gaussians  $G^*$ ,  $G''$ ,  $D+D'$  and  $2D'$  to the Raman spectra in the region 2300-3200  $\text{cm}^{-1}$ .
- **Table S6.** Elemental composition (% w/w) of the ACs from XPS data compared with elemental analysis and EDX data.
- **Figure S9.** Selected  $^{13}\text{C}$  NMR spectra in the solid state of the prepared AC.

- **Figure S10.** Selected N<sub>2</sub> absorption isotherm profiles together with pore size distribution.
- **Figure S11.** ESEM images of the activated carbons at different magnifications.
- **Figure S12.** TEM images of the samples AAC-5, AAC-6, and AAC-7, prepared by KOH activation at 600°C, 700°C and 800°C, respectively.
- **Figure S13. (a):** Raman I<sub>D</sub>/I<sub>G</sub> ratio *vs* pore diameter for samples with BET values higher than 1000 m<sup>2</sup>/g. **(b):** Raman I<sub>D</sub>/I<sub>G</sub> ratio *vs* pore diameter for samples with BET values lower than 1000 m<sup>2</sup>/g.
- **Figure S14:** Raman I<sub>D</sub>/I<sub>G</sub> ratio *vs* specific surface area for samples with BET values higher than 1000 m<sup>2</sup>/g.

**Figure S1. ESEM data of the starting SCGs.**

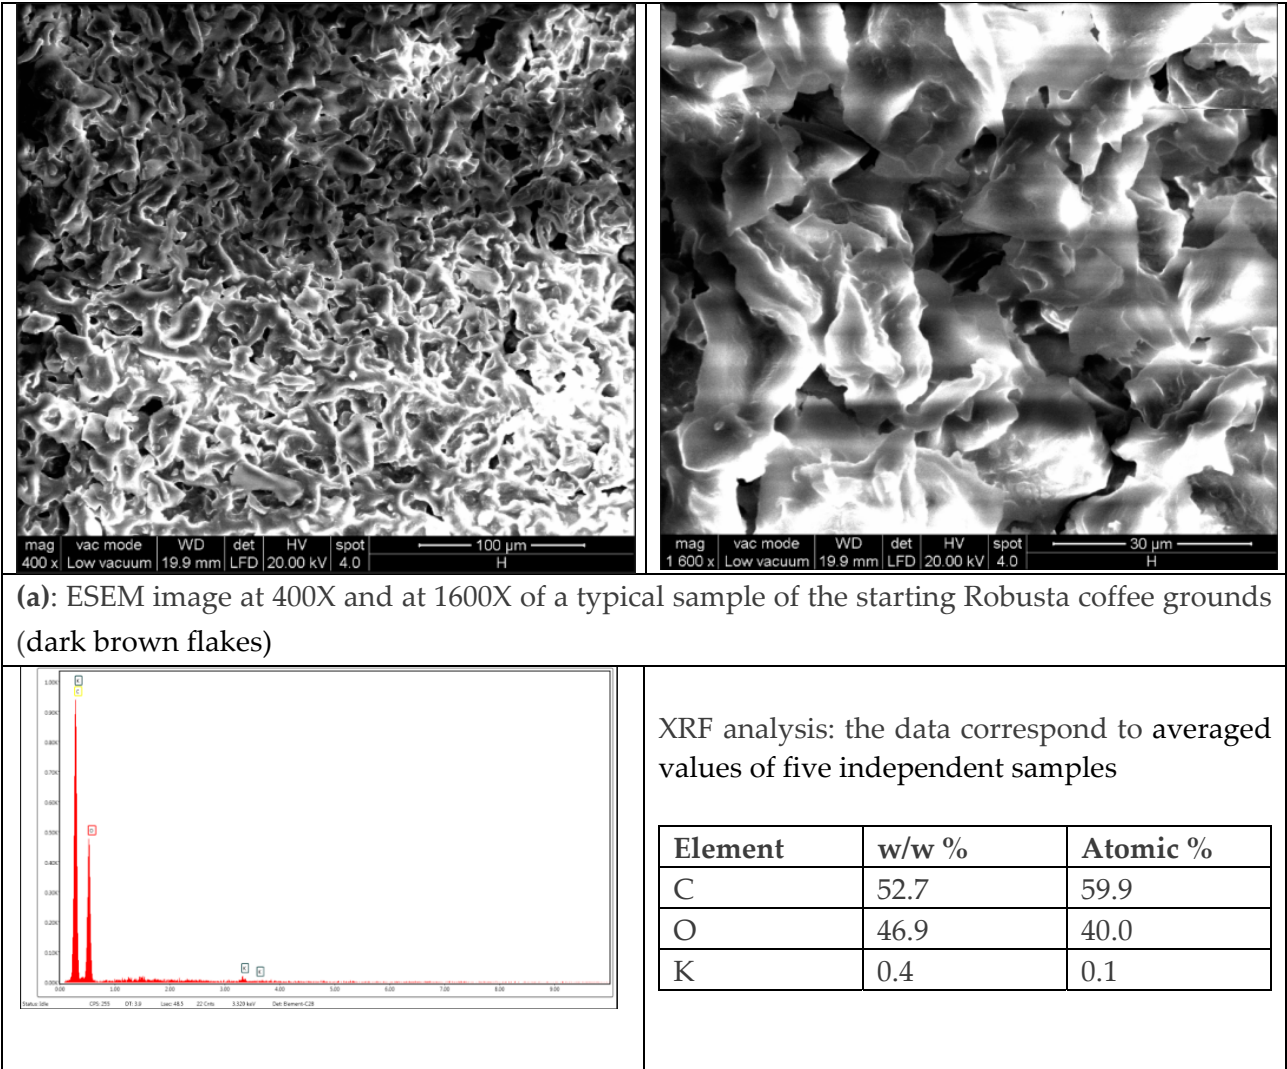

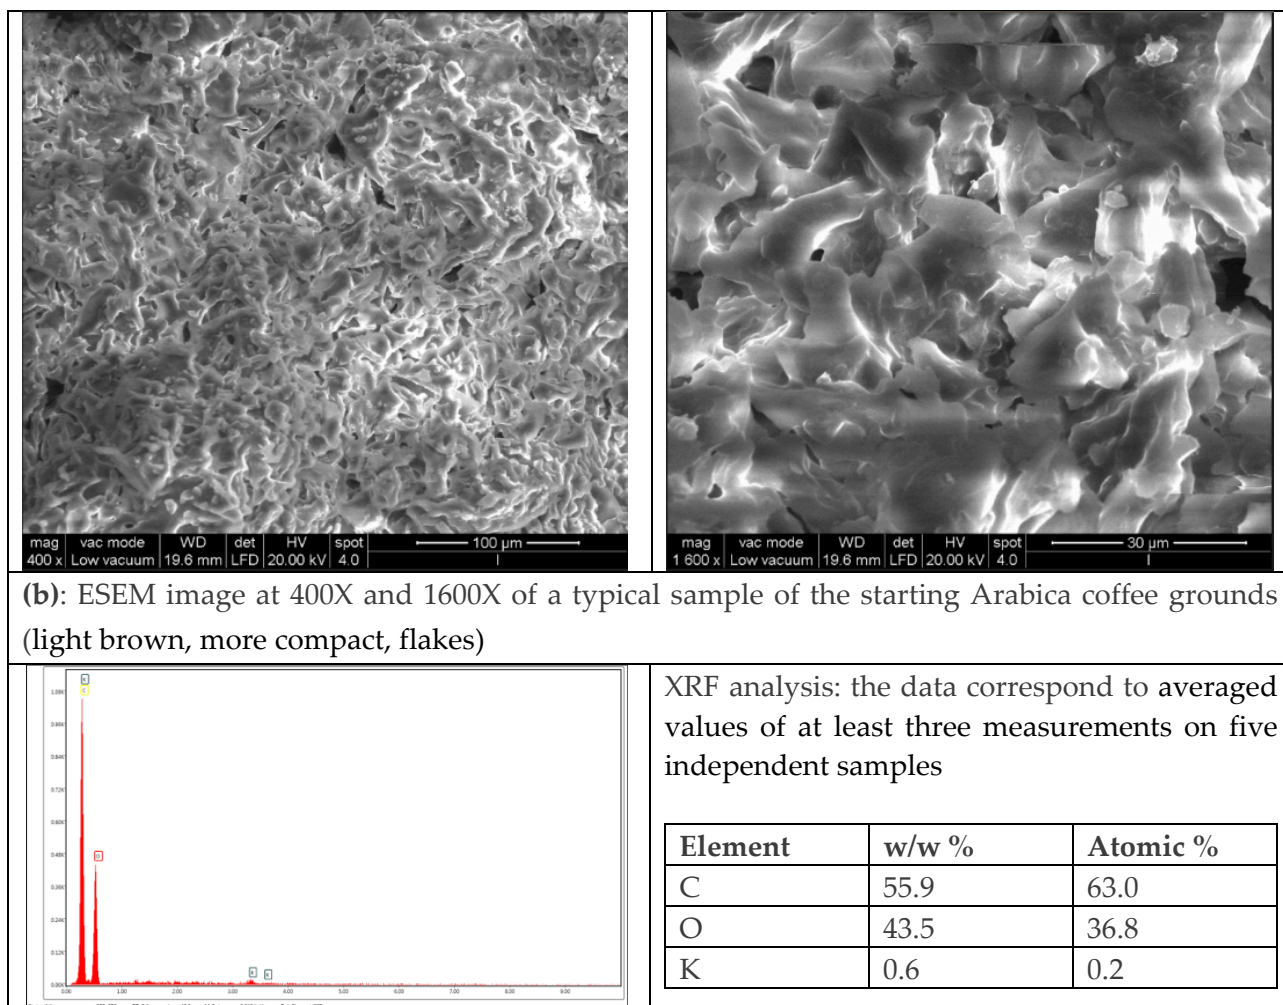

**Figure S2. GC MS analysis of the EtOH mother liquors after washing spent coffee grounds from Arabica.**

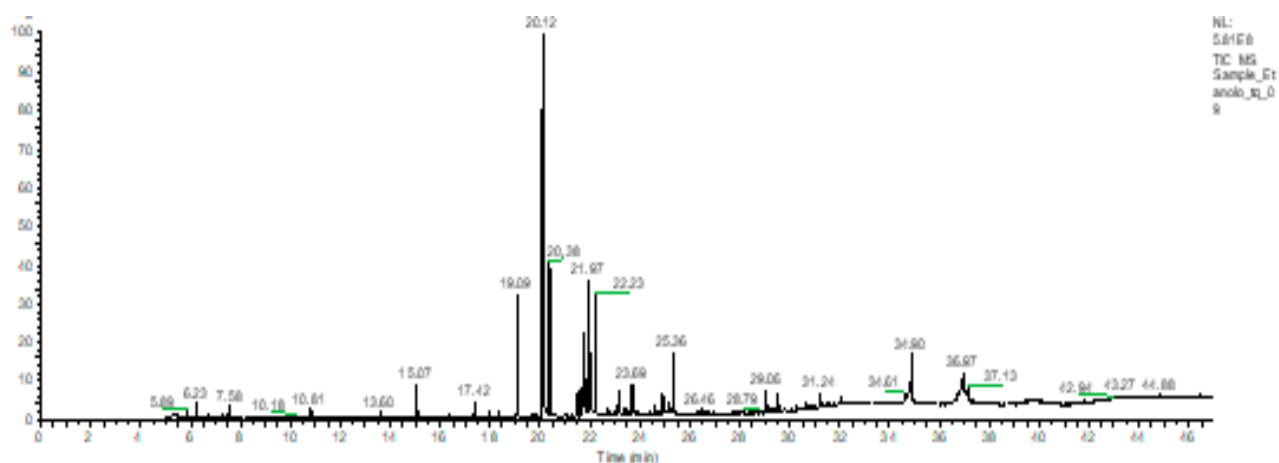

| Retention time (min) | Some peaks identification according to library |
|----------------------|------------------------------------------------|
| 15.07                | N,N-dimethyl dodecanamine                      |
| 19.09                | Caffeine                                       |
| 20.12                | Hexadecanoic acid (C16)                        |
| 20.36                | Hexadecanoic acid methyl ester                 |
| 21.97                | Octadecanoic acid (C18)                        |
| 22.23                | 15-methyl-heptadecanoic acid ethyl ester       |
| 23.09                | Icosanoic acid (C20)                           |
| 25.30                | 9,11-octadiene acid ethyl ester                |
| 34.90                | Hexadecanoic acid ethyl ester                  |

**Figure S3. (a).  $^{13}\text{C}$  HPDEC NMR spectrum in the solid state of caffeine. (b).  $^{13}\text{C}$  HPDEC NMR in the solid state of R and A samples.**

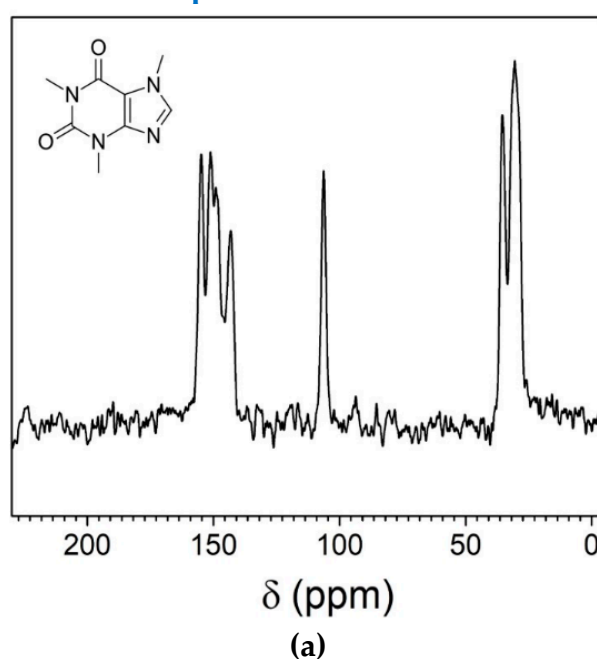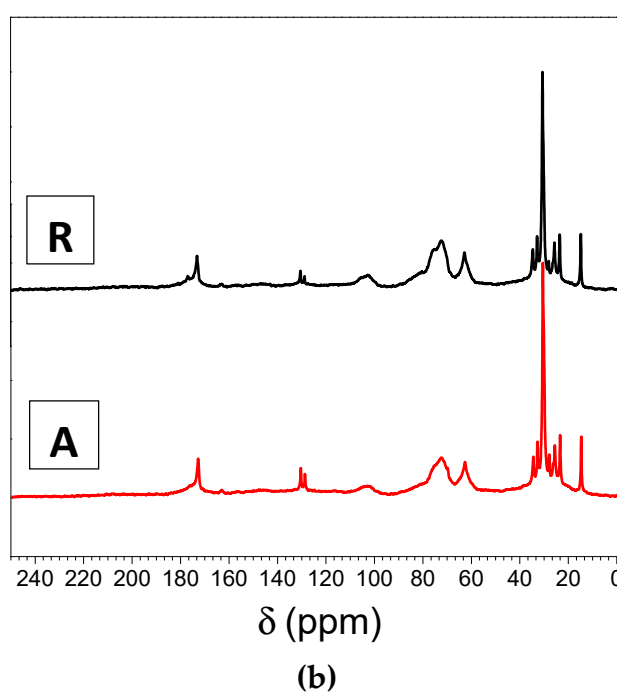



**Table S1.  $^{13}\text{C}$  MAS Chemical shifts.**

|          |       |       |       |            |           |           |      |      |      |      |      |      |      |
|----------|-------|-------|-------|------------|-----------|-----------|------|------|------|------|------|------|------|
| <b>A</b> | 172.8 | 130.4 | 128.7 | 102.4 (br) | 72.4 (br) | 62.6 (br) | 34.4 | 32.7 | 30.5 | 27.9 | 25.6 | 23.4 | 14.7 |
| <b>R</b> | 173.0 | 130.4 | 128.7 | 102.4 (br) | 72.1 (br) | 62.7 (br) | 34.5 | 32.7 | 30.5 | 27.9 | 25.6 | 23.4 | 14.7 |

**Figure S4. TG and DTG profiles of R and A under air.**

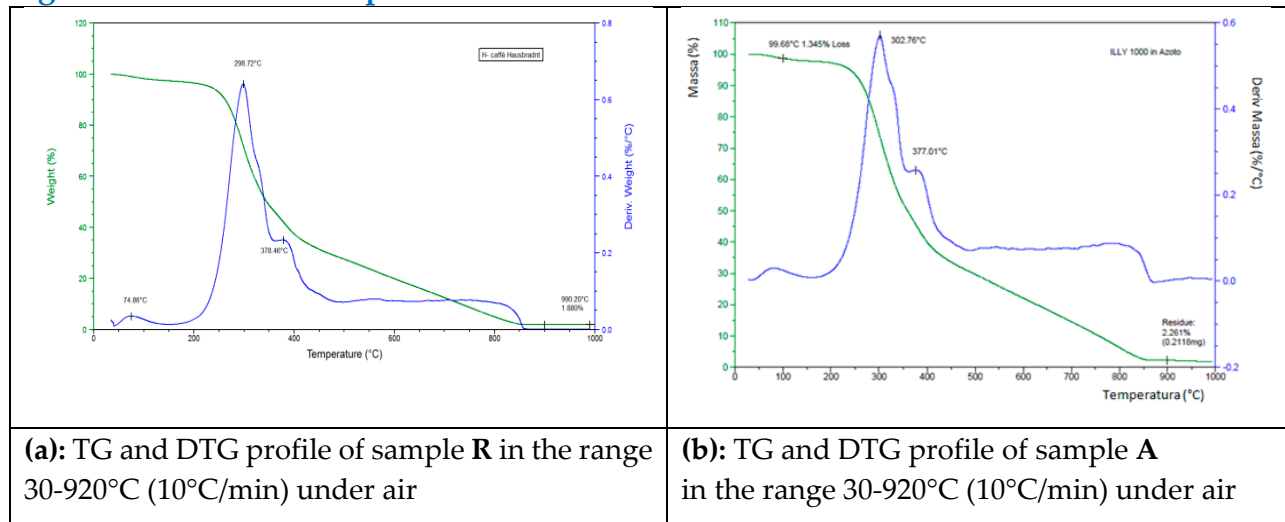

Both samples showed, under air, from room temperature to 100°C the release of residual moisture (ca. 5% at about 75°C). In the range from 200°C to 400°C a weight loss of about 60% could be observed followed by a progressive weight loss until final residue of about 2% w/w.

**Table S2: TG and DTG data of samples A, R, A/KOH, and R/KOH 1/1 mixtures in the range 30-1000°C under nitrogen.**

| Sample       | T (°C)  | Weight loss (%) | Combined weight loss (%) | Notes                                                                                                                            |
|--------------|---------|-----------------|--------------------------|----------------------------------------------------------------------------------------------------------------------------------|
| <b>A</b>     | 108     | 3               | 72                       | moisture loss                                                                                                                    |
|              | 298     | 32              |                          | emicellulose decomposition                                                                                                       |
|              | 332     | 5               |                          | cellulose decomposition                                                                                                          |
|              | 389     | 35              |                          | lignine decomposition<br>final residue = 22.76%                                                                                  |
| <b>R</b>     | 95      | 4               | 70                       | moisture loss                                                                                                                    |
|              | 300     | 25              |                          | emicellulose decomposition                                                                                                       |
|              | 334     | 10              |                          | cellulose decomposition                                                                                                          |
|              | 384     | 35              |                          | lignine decomposition<br>final residue = 23.01%                                                                                  |
| <b>A/KOH</b> | 101     | 5               | 20                       | moisture loss and H <sub>2</sub> evolution                                                                                       |
|              | 166     | 3               |                          | C <sub>2</sub> hydrocarbons, CH <sub>4</sub> and H <sub>2</sub> O evolution                                                      |
|              | 199     | 3               |                          |                                                                                                                                  |
|              | 214-225 | 9               |                          |                                                                                                                                  |
|              | 288     | 5               |                          | CO, CO <sub>2</sub> , CH <sub>4</sub> , C <sub>2</sub> H <sub>6</sub> , C <sub>2</sub> H <sub>4</sub> evolution<br>carbonization |
|              | 380-450 | 15              |                          |                                                                                                                                  |
|              | 600-800 | 10              |                          |                                                                                                                                  |
|              | 900     | 20              |                          | final residue = 31.44%                                                                                                           |
| <b>R/KOH</b> | 94      | 15              |                          | moisture loss and H <sub>2</sub> evolution                                                                                       |
|              | 280     | 15              |                          | C <sub>2</sub> hydrocarbons, CH <sub>4</sub> and H <sub>2</sub> O evolution                                                      |
|              | 377-410 | 15              |                          | CO, CO <sub>2</sub> , CH <sub>4</sub> , C <sub>2</sub> H <sub>6</sub> , C <sub>2</sub> H <sub>4</sub> evolution                  |
|              | 600-800 | 10              |                          | carbonization                                                                                                                    |

Figure S5. (a). GC MS analysis of the acetone solution of the residue after treatment at 380°C for 6 h under nitrogen of a 1:1 mixture A:KOH. (b). ESEM images of the black powder recovered from treatment at 380°C for 6 h under nitrogen of a 1:1 mixture A:KOH.

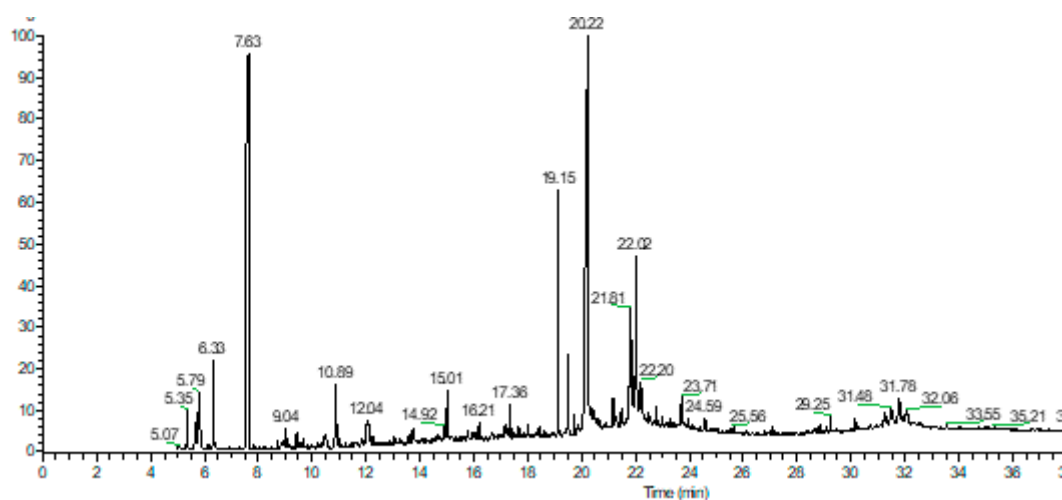

| Retention time (min) | Some peaks identification according to library |
|----------------------|------------------------------------------------|
| 7.63                 | 3-ethoxy propanoic acid ethyl ester            |
| 19.15                | Caffeine                                       |
| 20.22                | Hexadecanoic acid methyl ester                 |
| 21.81                | Octadecanoic acid methyl ester                 |
| 22.02                | Octadecanoic acid ethyl ester                  |

(a)

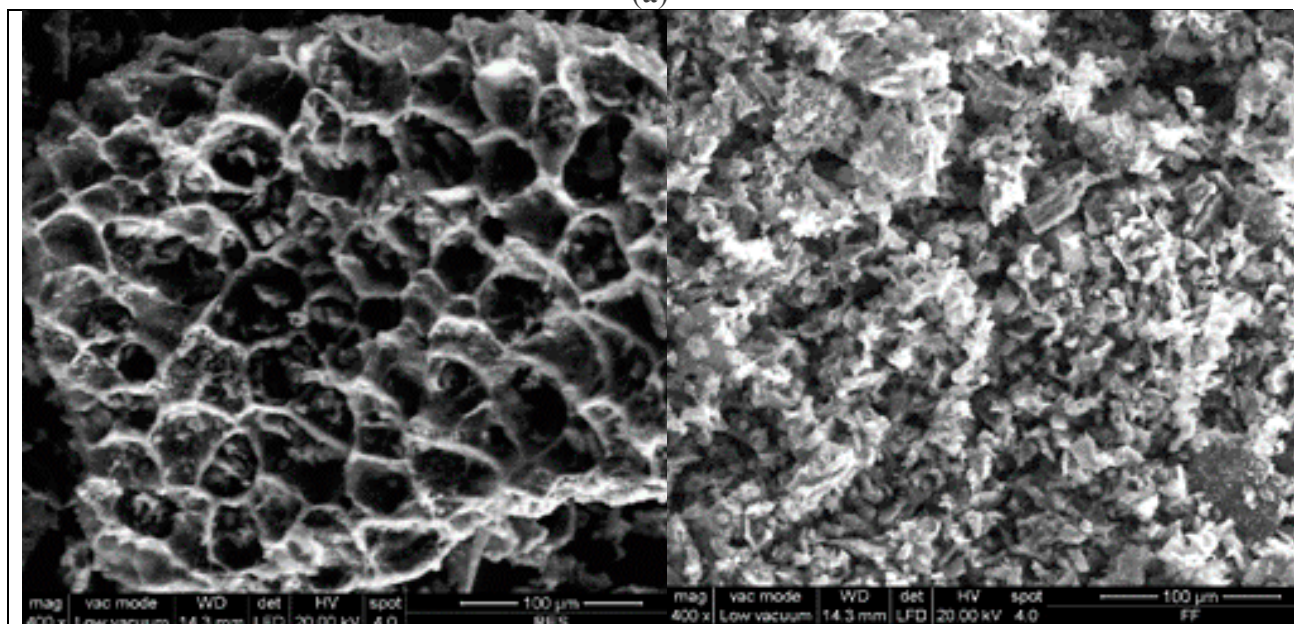

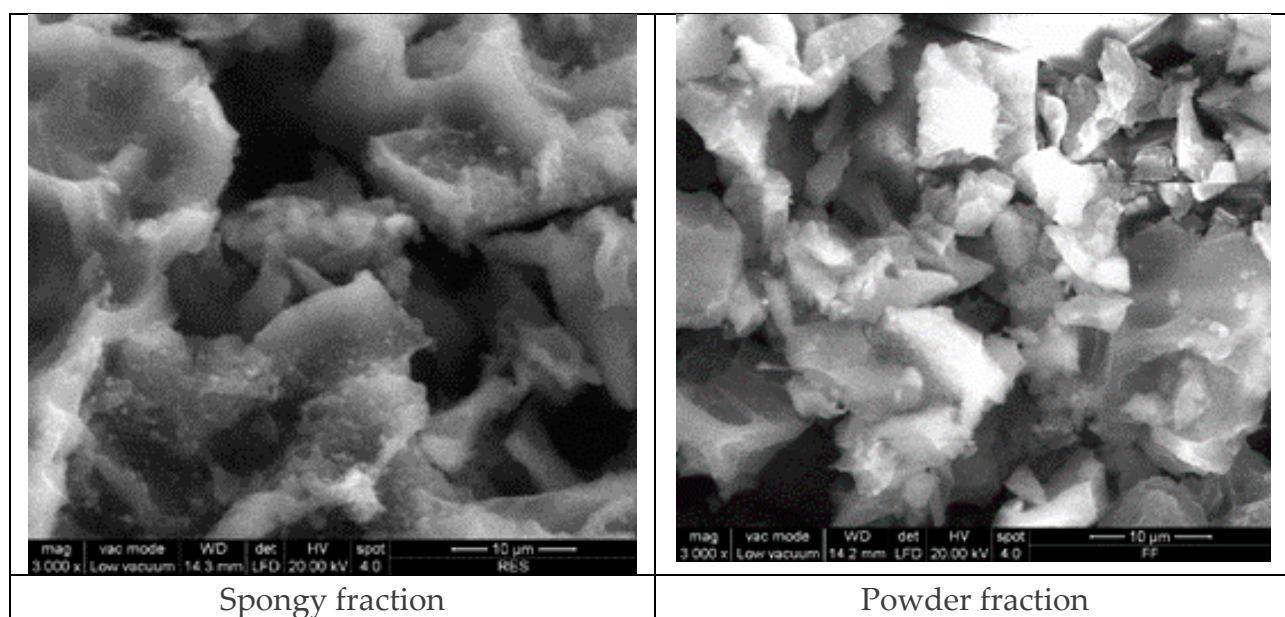

(b)

Figure S6. Raman spectra of the prepared activated carbons.

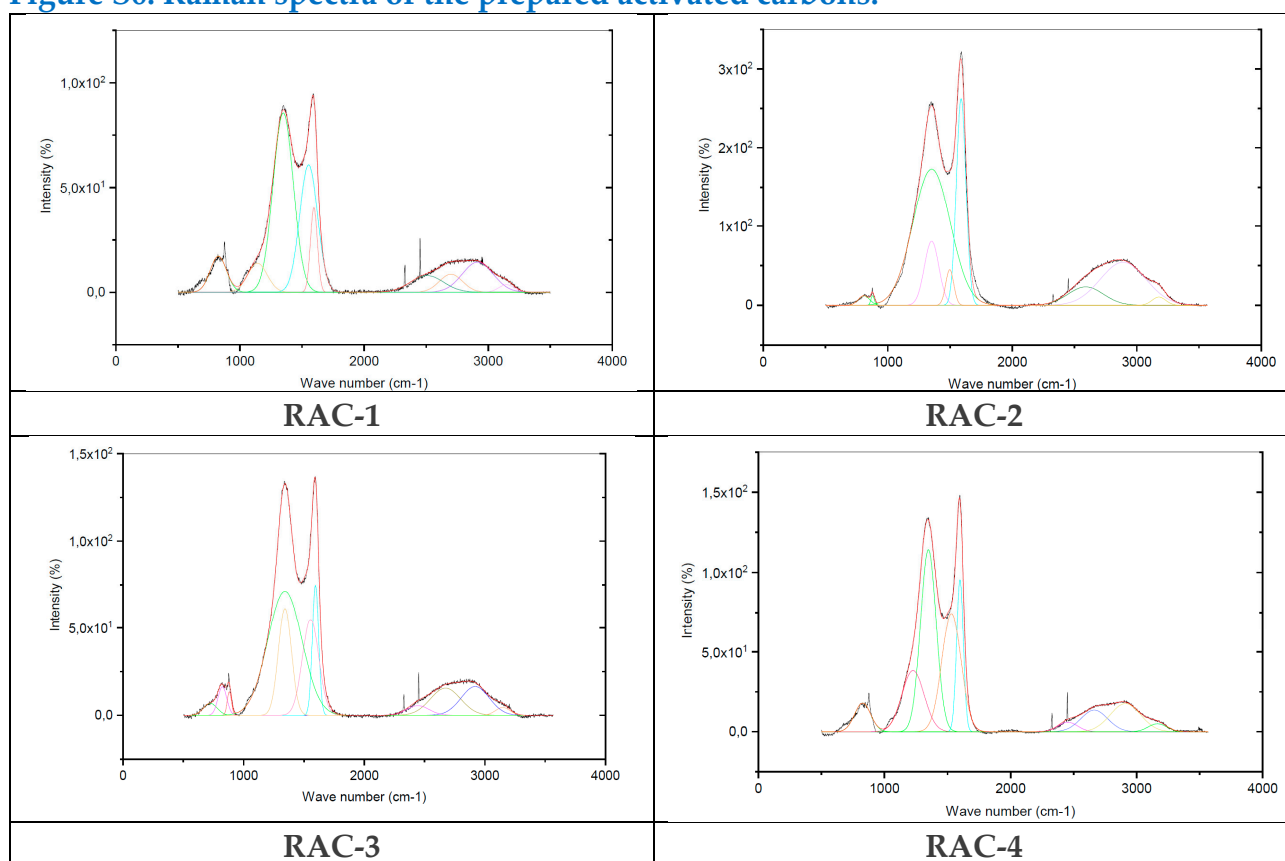

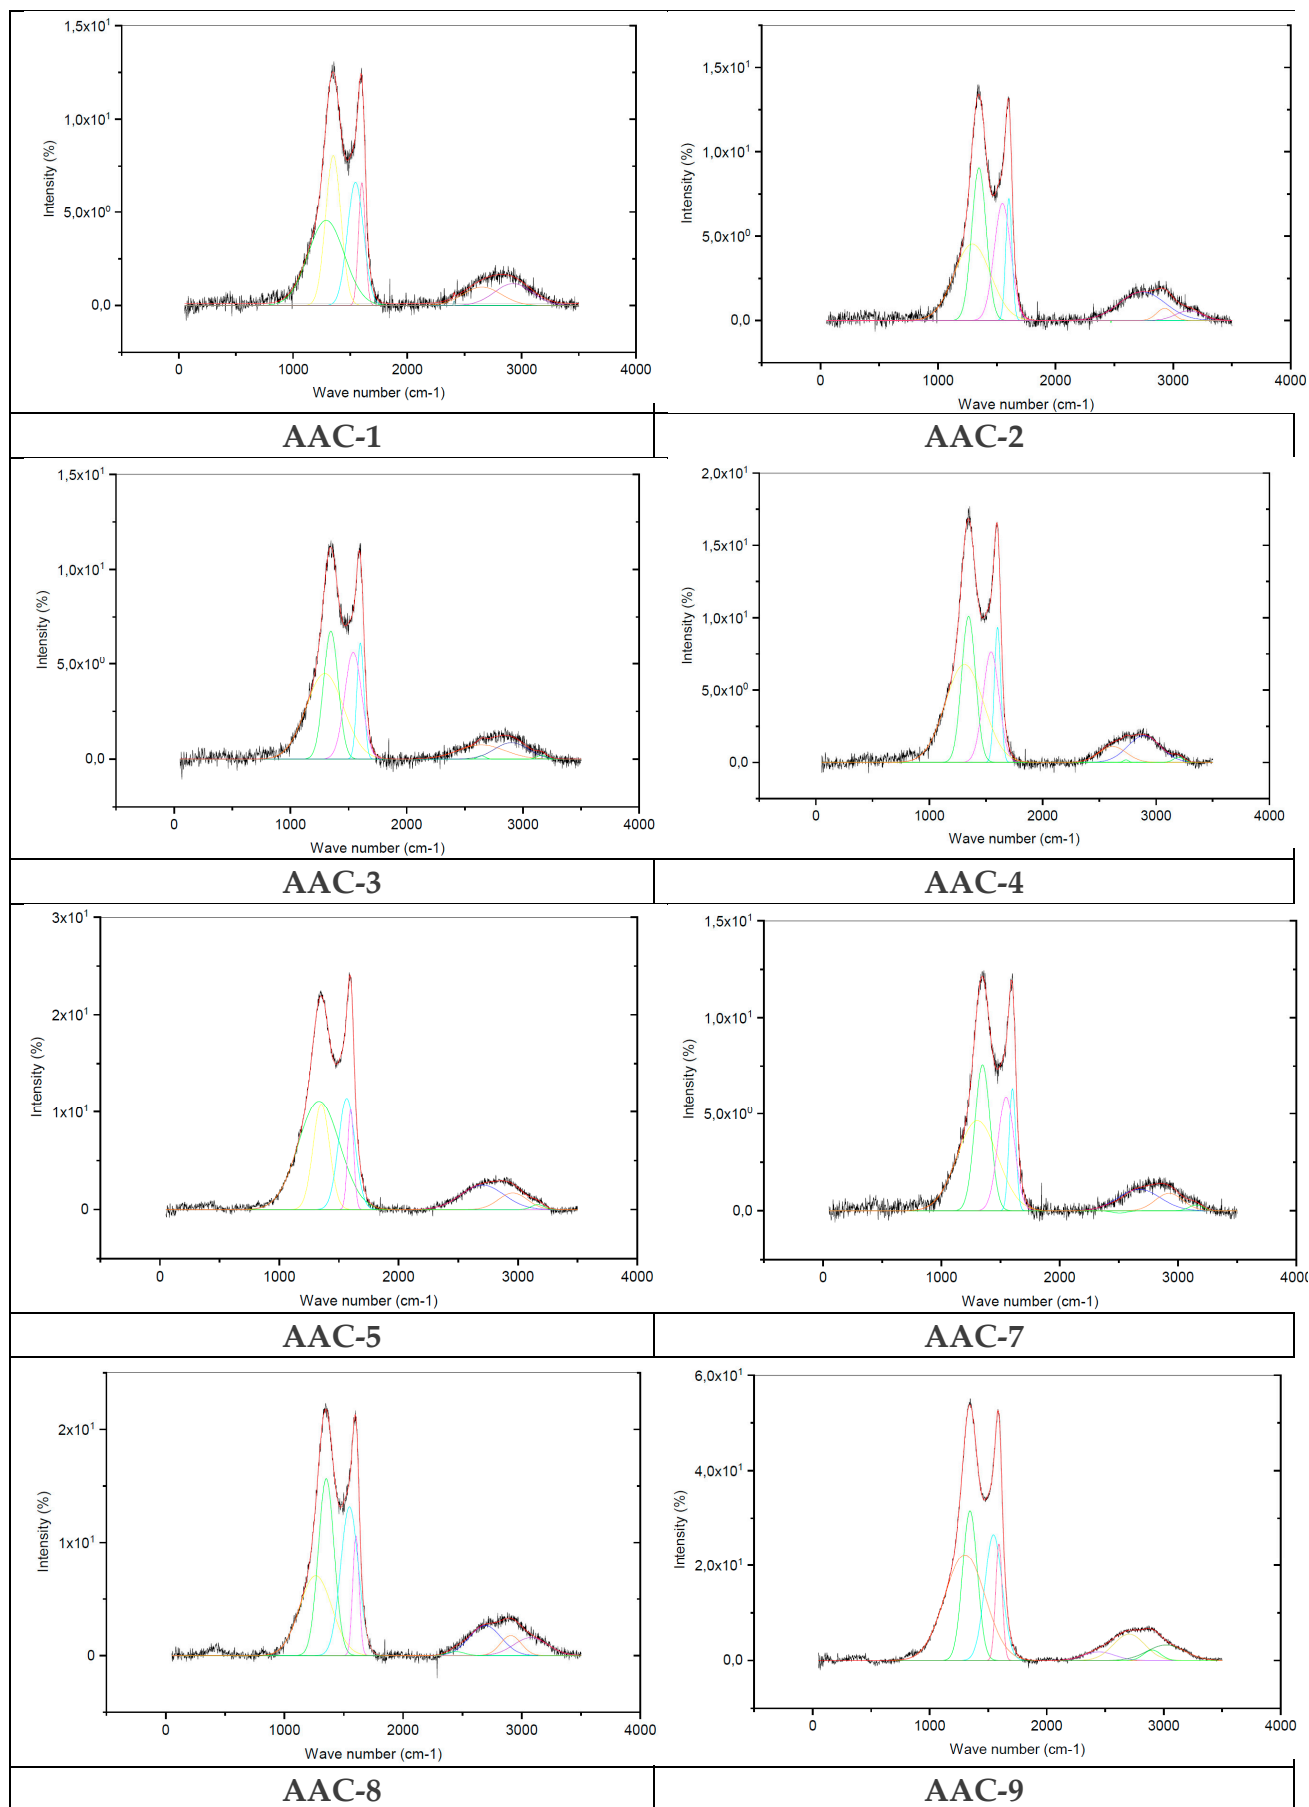

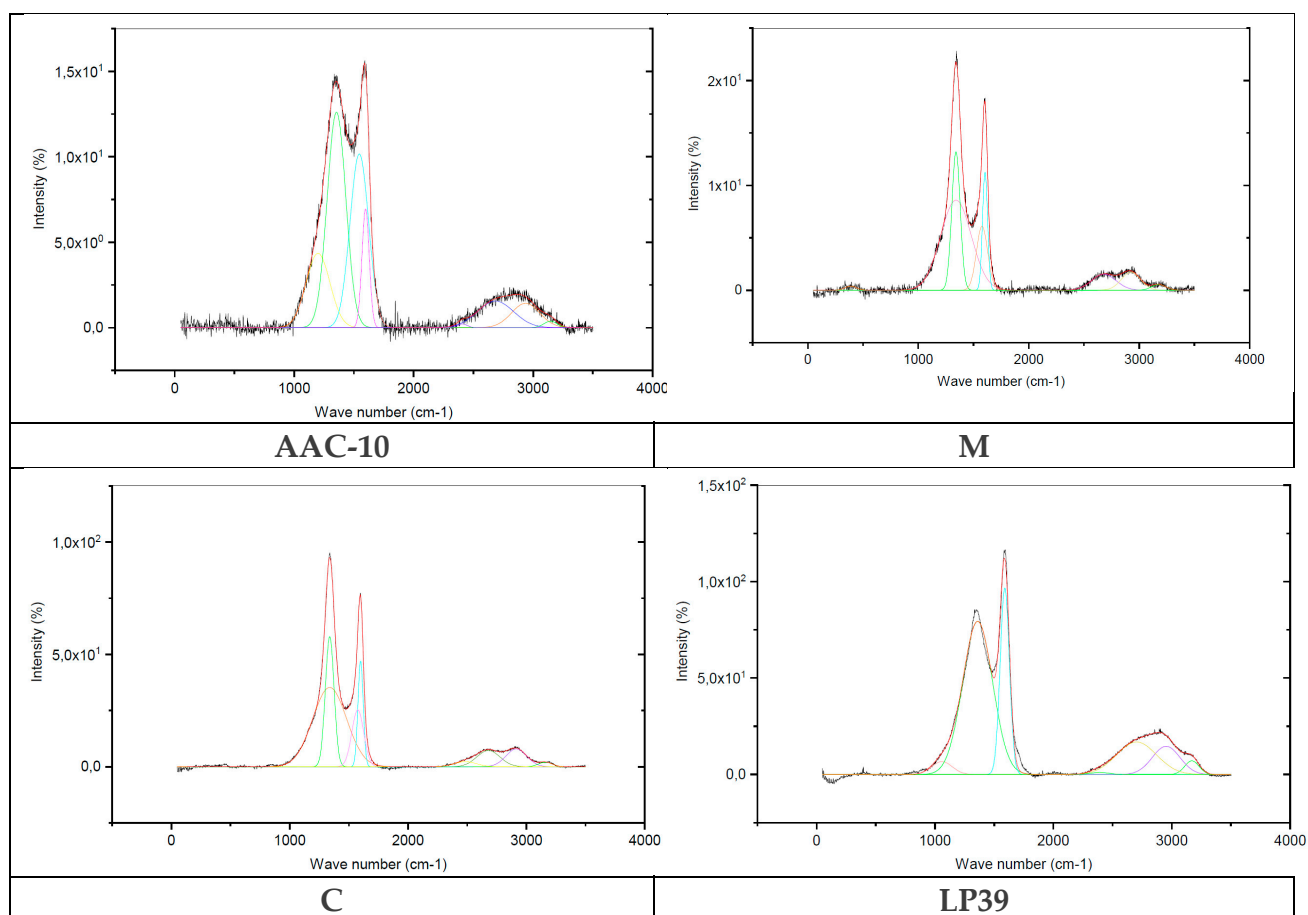

Figure S7. XRD spectra.

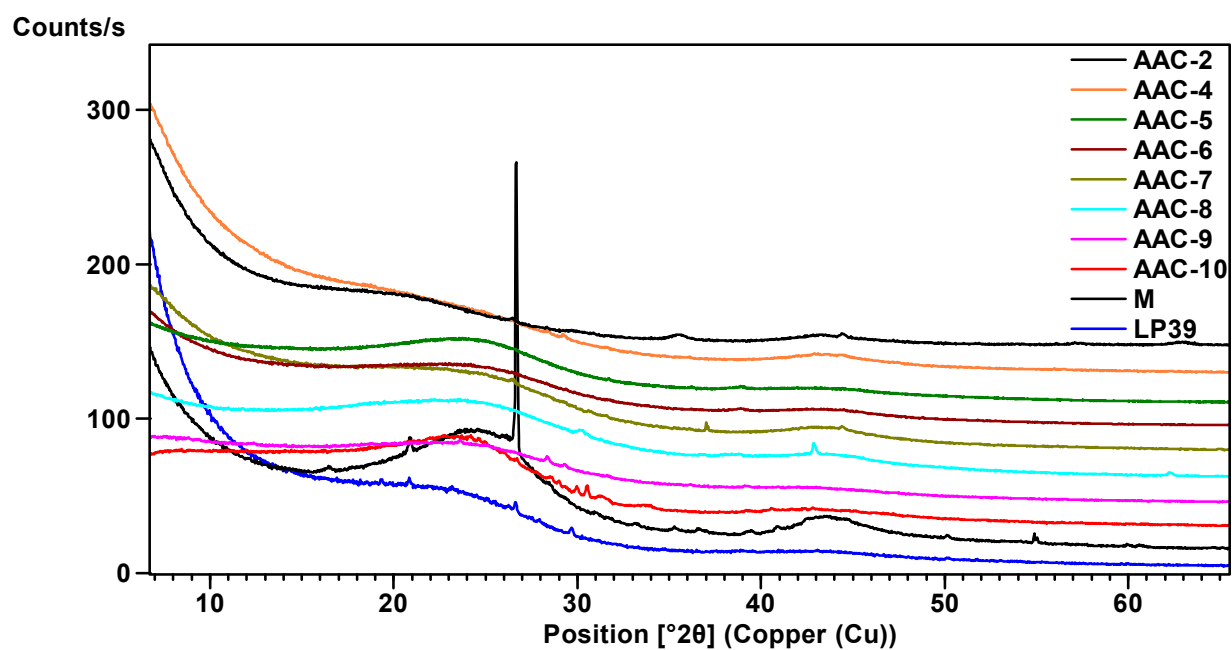

**Figure S8. XPS spectra: (a) C 1s signal; (b) O 1s signal; (c) N 1s signal.**

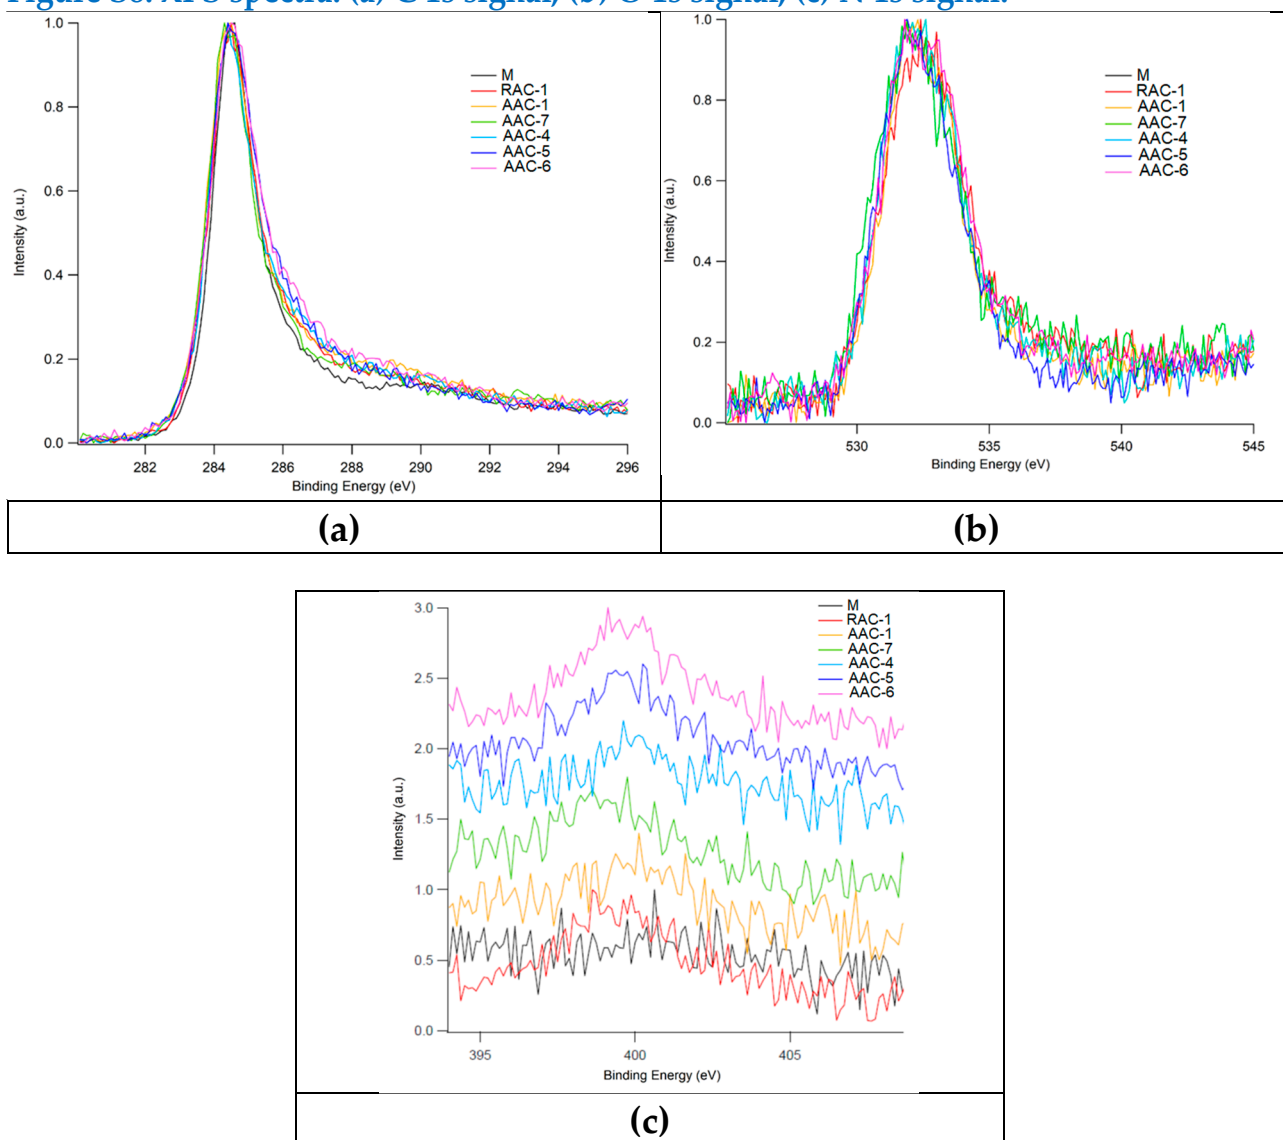

**Figure S9. Selected  $^{13}\text{C}$  NMR spectra in the solid state of the prepared AC.**

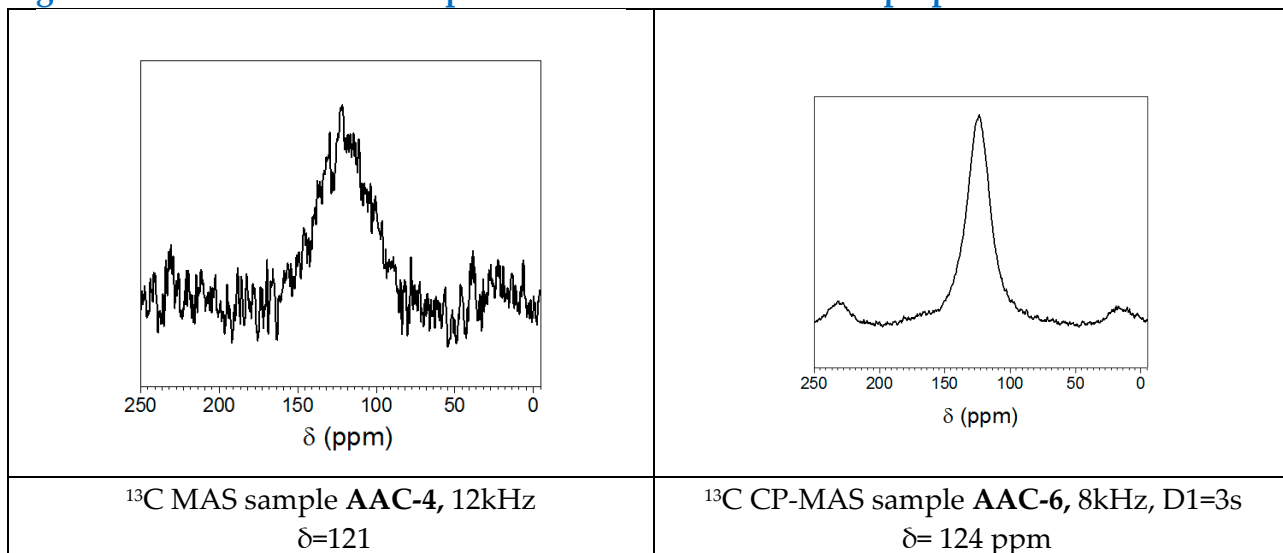



|                                                                                                                                                                                            |                                                                                                                                                                                            |
|--------------------------------------------------------------------------------------------------------------------------------------------------------------------------------------------|--------------------------------------------------------------------------------------------------------------------------------------------------------------------------------------------|
| 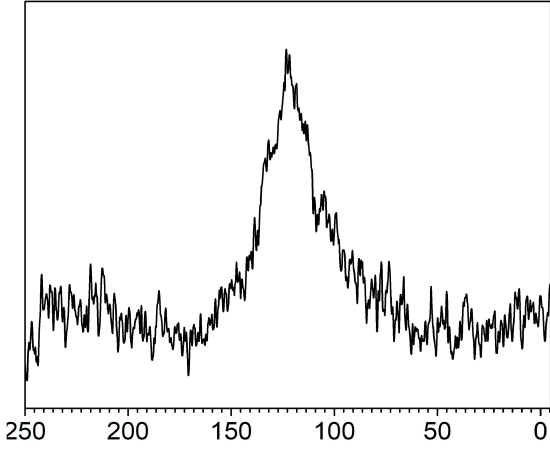                                                                                                          |                                                                                                          |
| <p><math>^{13}\text{C}</math> MAS sample <b>AAC-9</b>, 10kHz,<br/>without <math>^1\text{H}</math>-<math>^{13}\text{C}</math> dipolar decoupling<br/><math>\delta=125</math> ppm</p>        | <p><math>^{13}\text{C}</math> MAS sample <b>AAC-10</b>, 10kHz<br/><math>\delta=126</math> ppm</p>                                                                                          |
|                                                                                                          |                                                                                                         |
| <p><math>^{13}\text{C}</math> MAS commercial sample <b>C</b>, 10kHz,<br/>without <math>^1\text{H}</math>-<math>^{13}\text{C}</math> dipolar decoupling<br/><math>\delta=120</math> ppm</p> | <p><math>^{13}\text{C}</math> MAS commercial sample <b>M</b>, 10kHz,<br/>without <math>^1\text{H}</math>-<math>^{13}\text{C}</math> dipolar decoupling<br/><math>\delta=120</math> ppm</p> |
|                                                                                                         |                                                                                                                                                                                            |
| <p><math>^{13}\text{C}</math> CP-MAS commercial sample <b>LP39</b>,<br/>10kHz, D1=2s<br/><math>\delta=128, 153</math> (shoulder), 187 ppm</p>                                              |                                                                                                                                                                                            |

**Table S3. Parameters obtained from fitting two Gaussians as G and D bands to the Raman spectra of the ACs sample.**

| Sample      | G band                       |                          |      | D band                       |                          |      | I <sub>D</sub> /I <sub>G</sub> |
|-------------|------------------------------|--------------------------|------|------------------------------|--------------------------|------|--------------------------------|
|             | Position (cm <sup>-1</sup> ) | FWHM (cm <sup>-1</sup> ) | Area | Position (cm <sup>-1</sup> ) | FWHM (cm <sup>-1</sup> ) | Area |                                |
| RAC-1       | 1584                         | 88                       | 138  | 1353                         | 323                      | 202  | 1,46                           |
| RAC-2       | 1587                         | 85                       | 286  | 1350                         | 314                      | 766  | 2,68                           |
| RAC-3       | 1586                         | 83                       | 143  | 1345                         | 259                      | 285  | 1,99                           |
| RAC-4       | 1591                         | 74                       | 205  | 1343                         | 271                      | 262  | 1,28                           |
| AAC-1       | 1588                         | 87                       | 166  | 1351                         | 260                      | 315  | 1,90                           |
| AAC-2       | 1590                         | 86                       | 203  | 1349                         | 237                      | 316  | 1,56                           |
| AAC-3       | 1588                         | 84                       | 143  | 1350                         | 365                      | 445  | 2,55                           |
| AAC-4       | 1590                         | 85                       | 201  | 1349                         | 268                      | 422  | 2,10                           |
| AAC-5       | 1589                         | 87                       | 262  | 1353                         | 312                      | 668  | 2,55                           |
| AAC-6       | 1588                         | 87                       | 182  | 1351                         | 301                      | 365  | 2,00                           |
| AAC-7       | 1587                         | 85                       | 147  | 1348                         | 266                      | 279  | 1,90                           |
| AAC-8       | 1590                         | 97                       | 317  | 1352                         | 265                      | 586  | 1,85                           |
| AAC-9       | 1580                         | 87                       | 671  | 1346                         | 279                      | 1039 | 1,55                           |
| AAC-10      | 1585                         | 94                       | 204  | 1354                         | 339                      | 355  | 1,74                           |
| Sample M    | 1597                         | 69                       | 141  | 1341                         | 152                      | 424  | 3,00                           |
| Sample C    | 1592                         | 67                       | 578  | 1337                         | 147                      | 1794 | 3,10                           |
| Sample LP39 | 1588                         | 80                       | 946  | 1350                         | 239                      | 2654 | 2,81                           |

All the values have been obtained from the average of three measurements in different samples of each carbon.

**Table S4. Parameters in ACs samples obtained from fitting four Gaussians G1, G2, D1 and D2 to the Raman spectra in the region 1000-1600 cm<sup>-1</sup>.**

| Sample | G1                        |                           | G2                        |                           | D1                        |                           | D2                        |                           | I <sub>D1</sub> /I <sub>G1</sub> | I <sub>D2</sub> /I <sub>G2</sub> | I <sub>G2</sub> /I <sub>G1</sub> |
|--------|---------------------------|---------------------------|---------------------------|---------------------------|---------------------------|---------------------------|---------------------------|---------------------------|----------------------------------|----------------------------------|----------------------------------|
|        | $\nu$ (cm <sup>-1</sup> ) |                                  |                                  |                                  |
| RAC-1  | 1595                      | 66                        | 1552                      | 170                       | 1348                      | 154                       | 1140                      | 192                       | 6.20                             | 0.25                             | 3.88                             |
| RAC-2  | 1589                      | 70                        | 1497                      | 175                       | 1352                      | 136                       | 1350                      | 352                       | 2.59                             | 3.26                             | 0.14                             |
| RAC-3  | 1596                      | 63                        | 1555                      | 169                       | 1342                      | 127                       | 1338                      | 333                       | 5.17                             | 0.89                             | 1.91                             |
| RAC-4  | 1599                      | 63                        | 1531                      | 179                       | 1348                      | 146                       | 1226                      | 207                       | 2.79                             | 0.60                             | 2.22                             |
| AAC-1  | 1602                      | 69                        | 1546                      | 165                       | 1351                      | 157                       | 1289                      | 372                       | 2.78                             | 1.54                             | 2.41                             |
| AAC-2  | 1602                      | 61                        | 1548                      | 166                       | 1349                      | 144                       | 1292                      | 367                       | 2.94                             | 1.44                             | 2.59                             |
| AAC-3  | 1601                      | 69                        | 1540                      | 171                       | 1348                      | 147                       | 1296                      | 379                       | 2.80                             | 2.30                             | 2.25                             |
| AAC-4  | 1602                      | 66                        | 1545                      | 166                       | 1347                      | 144                       | 1310                      | 398                       | 2.35                             | 2.12                             | 2.04                             |
| AAC-5  | 1598                      | 61                        | 1565                      | 161                       | 1353                      | 161                       | 1333                      | 408                       | 2.84                             | 2.46                             | 2.99                             |
| AAC-6  | 1593                      | 75                        | 1562                      | 162                       | 1349                      | 184                       | 1277                      | 256                       | 2.22                             | 1.69                             | 2.40                             |
| AAC-7  | 1600                      | 65                        | 1547                      | 163                       | 1348                      | 152                       | 1303                      | 402                       | 2.75                             | 1.94                             | 2.29                             |
| AAC-8  | 1603                      | 65                        | 1546                      | 168                       | 1353                      | 157                       | 1264                      | 319                       | 1.84                             | 0.98                             | 3.44                             |
| AAC-9  | 1592                      | 66                        | 1545                      | 174                       | 1344                      | 147                       | 1301                      | 406                       | 2.87                             | 1.93                             | 2.88                             |
| AAC-10 | 1598                      | 72                        | 1545                      | 183                       | 1354                      | 183                       | 1199                      | 234                       | 4.62                             | 0.55                             | 3.73                             |
| M      | 1604                      | 54                        | 1576                      | 124                       | 1342                      | 89                        | 1340                      | 295                       | 1.96                             | 3.85                             | 1.21                             |
| C      | 1602                      | 53                        | 1571                      | 138                       | 1338                      | 86                        | 1338                      | 336                       | 2.04                             | 3.98                             | 1.22                             |
| LP39   | 1590                      | 92                        | -                         | -                         | 1361                      | 297                       | -                         | -                         | 2.65                             | -                                | -                                |

All the values have been obtained from the average of three measurements in different samples of each carbon.

**Table S5. Parameters in ACs samples obtained from fitting four Gaussians  $G^*$ ,  $G''$ ,  $D+D'$  and  $2D'$  to the Raman spectra in the region 2300-3200  $\text{cm}^{-1}$ .**

| Sample | $G^*$                      |                            | $G''$                      |                            | $D+D'$                     |                            | $2D'$                      |                            |
|--------|----------------------------|----------------------------|----------------------------|----------------------------|----------------------------|----------------------------|----------------------------|----------------------------|
|        | $\nu$ ( $\text{cm}^{-1}$ ) |
| RAC-1  | 2506                       | 314                        | 2699                       | 219                        | 2915                       | 292                        | 3147                       | 147                        |
| RAC-2  | -                          | -                          | 2590                       | 334                        | 2890                       | 432                        | 3178                       | 130                        |
| RAC-3  | 2444                       | 220                        | 2674                       | 294                        | 2920                       | 275                        | 3148                       | 173                        |
| RAC-4  | 2454                       | 183                        | 2664                       | 250                        | 2911                       | 282                        | 3166                       | 172                        |
| AAC-1  | 2408                       | 12                         | 2653                       | 398                        | 2925                       | 387                        | -                          | -                          |
| AAC-2  | 2471                       | 4                          | 2737                       | 458                        | 2928                       | 160                        | 3133                       | 263                        |
| AAC-3  | -                          | -                          | 2643                       | 76                         | 2901                       | 342                        | 3161                       | 100                        |
| AAC-4  | 2617                       | 287                        | 2735                       | 52                         | 2894                       | 341                        | 3200                       | 110                        |
| AAC-5  | -                          | -                          | 2703                       | 425                        | 2957                       | 283                        | 3165                       | 126                        |
| AAC-6  | 2622                       | 314                        | -                          | -                          | 2879                       | 360                        | -                          | -                          |
| AAC-7  | 2505                       | 137                        | 2672                       | 422                        | 2924                       | 278                        | 3153                       | 146                        |
| AAC-8  | 2444                       | 172                        | 2692                       | 317                        | 2908                       | 205                        | 3077                       | 339                        |
| AAC-9  | 2447                       | 316                        | 2704                       | 315                        | 2902                       | 172                        | 3020                       | 377                        |
| AAC-10 | 2407                       | 97                         | 2684                       | 357                        | 2937                       | 277                        | 3145                       | 130                        |
| M      | -                          | -                          | 2679                       | 258                        | 2925                       | 202                        | 3177                       | 150                        |
| C      | 2484                       | 218                        | 2679                       | 229                        | 2914                       | 206                        | 3159                       | 137                        |
| LP39   | 2390                       | 190                        | 2702                       | 397                        | 2952                       | 274                        | 3169                       | 143                        |

All the values have been obtained from the average of three measurements in different samples of each carbon.

**Table S6. Elemental composition (% w/w) of the ACs from XPS data compared with elemental analysis and EDX data.**

| Sample | XPS   |      |     | ESEM - EDX |      | Elemental Analysis |      |      |
|--------|-------|------|-----|------------|------|--------------------|------|------|
|        | C     | O    | N   | C          | O    | C                  | H    | N    |
| RAC-1  | 80.52 | 15.8 | 1.0 | 82.5       | 16.9 | 81.52              | 1.72 | 3.12 |
| RAC-2  | 86.51 | 10.9 | -   | 87.8       | 11.6 | 86.92              | 1.16 | 1.08 |
| RAC-3  | 88.05 | 10.1 | -   | 89.9       | 9.6  | 89.16              | 1.84 | 1.46 |
| RAC-4  | 91.89 | 5.1  | -   | 93.0       | 4.8  | 92.57              | 1.02 | 1.02 |
| AAC-1  | 86.5  | 12.9 | 0.6 | 85.3       | 13.8 | 86.85              | 0.44 | 1.20 |
| AAC-2  | 84.8  | 15.3 | -   | 83.4       | 15.5 | 81.54              | 0.49 | 0.67 |
| AAC-3  | 89.9  | 10.2 | -   | 88.3       | 10.7 | 89.19              | 0.56 | 0.27 |
| AAC-4  | 85.3  | 14.2 | 0.6 | 86.5       | 13.6 | 86.82              | 0.44 | 0.89 |
| AAC-5  | 81.0  | 17.0 | 2.0 | 80.4       | 17.5 | 79.36              | 1.72 | 2.07 |
| AAC-6  | 84.2  | 14.5 | 1.3 | 83.7       | 15.7 | 82.48              | 1.59 | 1.30 |
| AAC-7  | 87.3  | 12.0 | 0.7 | 86.2       | 13.4 | 85.21              | 1.42 | 0.78 |
| AAC-8  | 71.3  | 28.7 | -   | 72.7       | 27.0 | 72.33              | 0.88 | 0.37 |
| AAC-9  | 85.3  | 14.6 | -   | 84.8       | 15.0 | 85.42              | 0.52 | 0.64 |
| AAC-10 | 80.4  | 19.6 | -   | 79.6       | 20.0 | 80.12              | 0.92 | 0.48 |
| M      | 90.2  | 7.8  | 0.3 | 92.4       | 6.7  | 91.8               | 0.98 | 0.51 |
| C      | 92.6  | 6.6  | -   | 94.0       | 5.6  | 93.1               | 0.37 | -    |
| LP39   | 84.9  | 10.2 | -   | 86.9       | 11.5 | 85.2               | 0.50 | -    |

Figure S10. Selected N<sub>2</sub> absorption isotherm profiles together with pore size distribution.

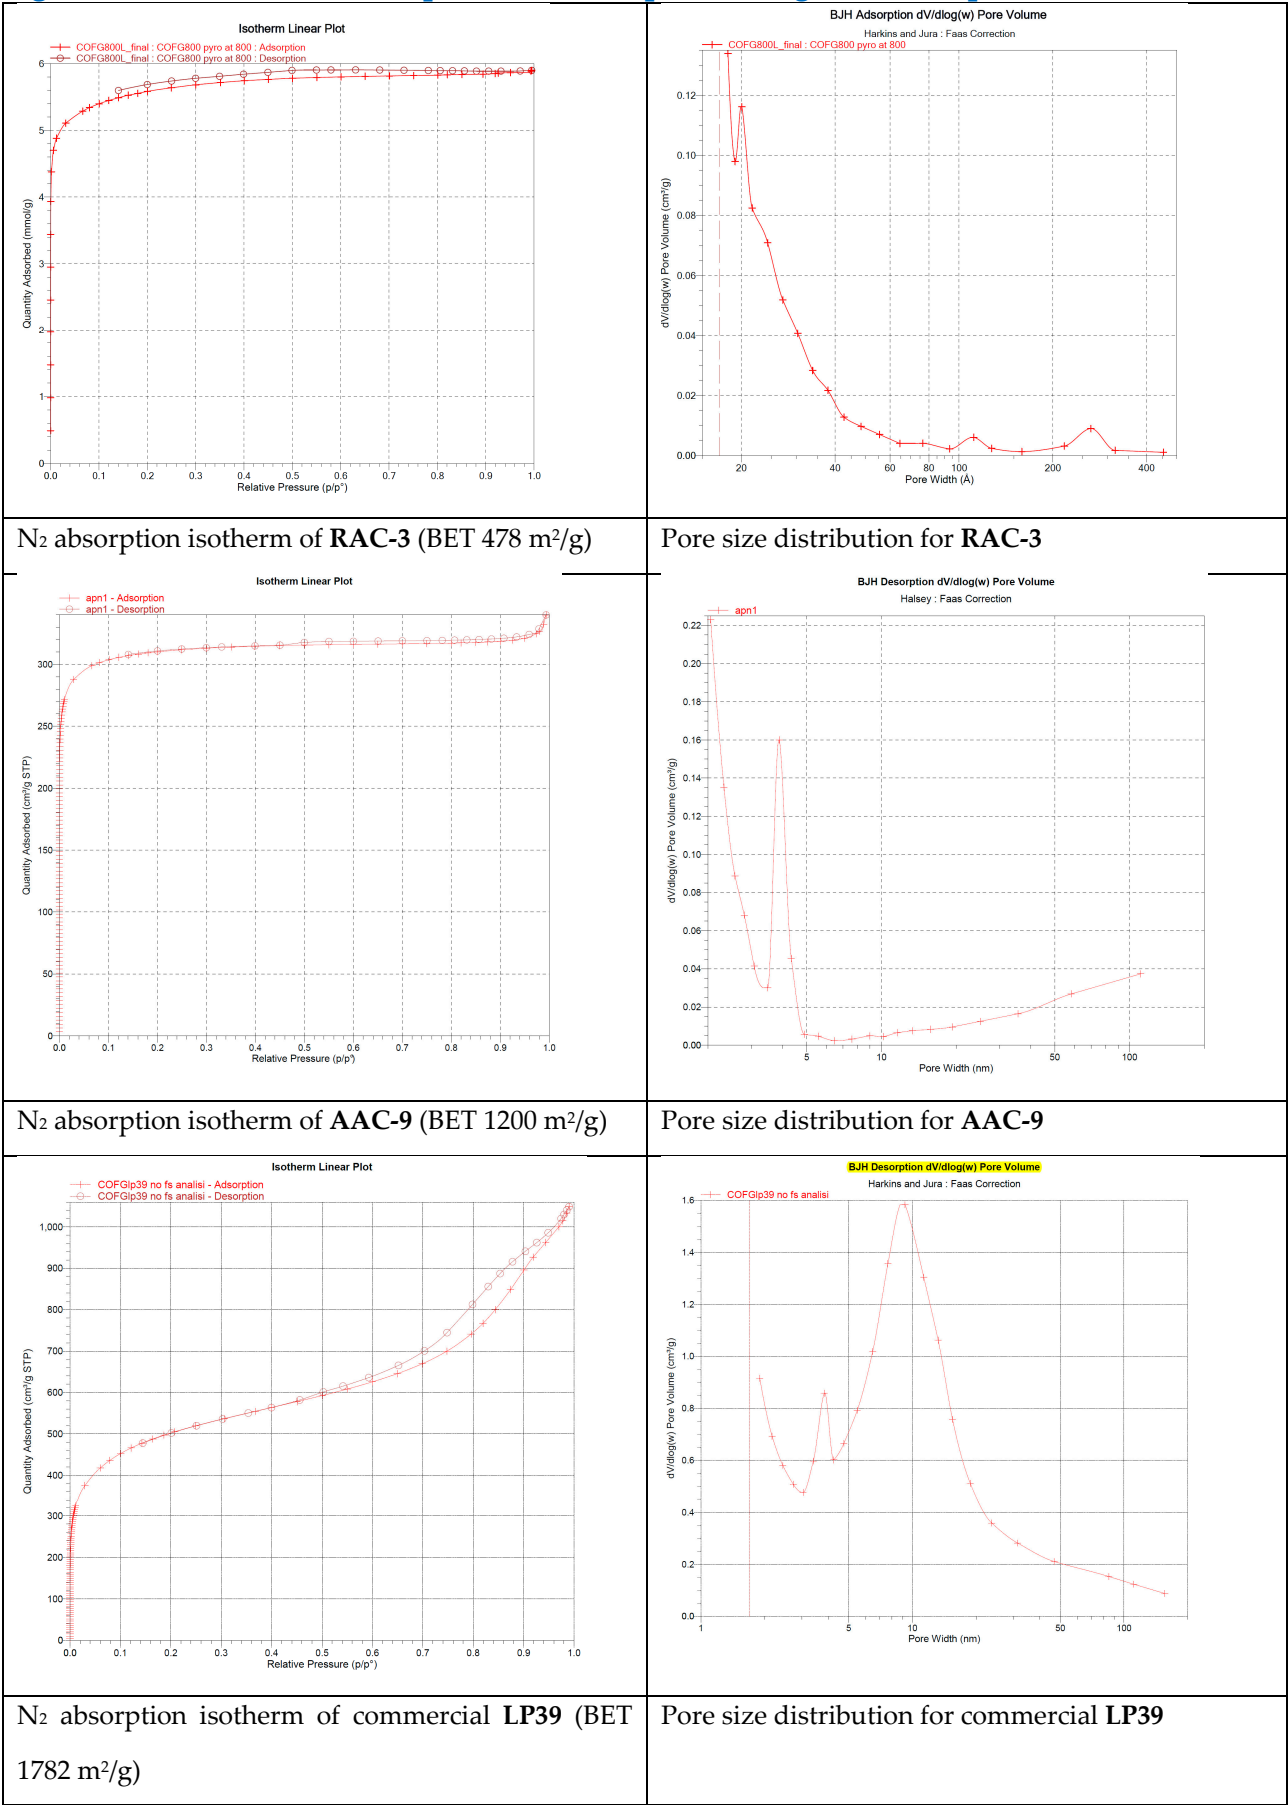

Figure S11. ESEM images of the activated carbons at different magnifications.

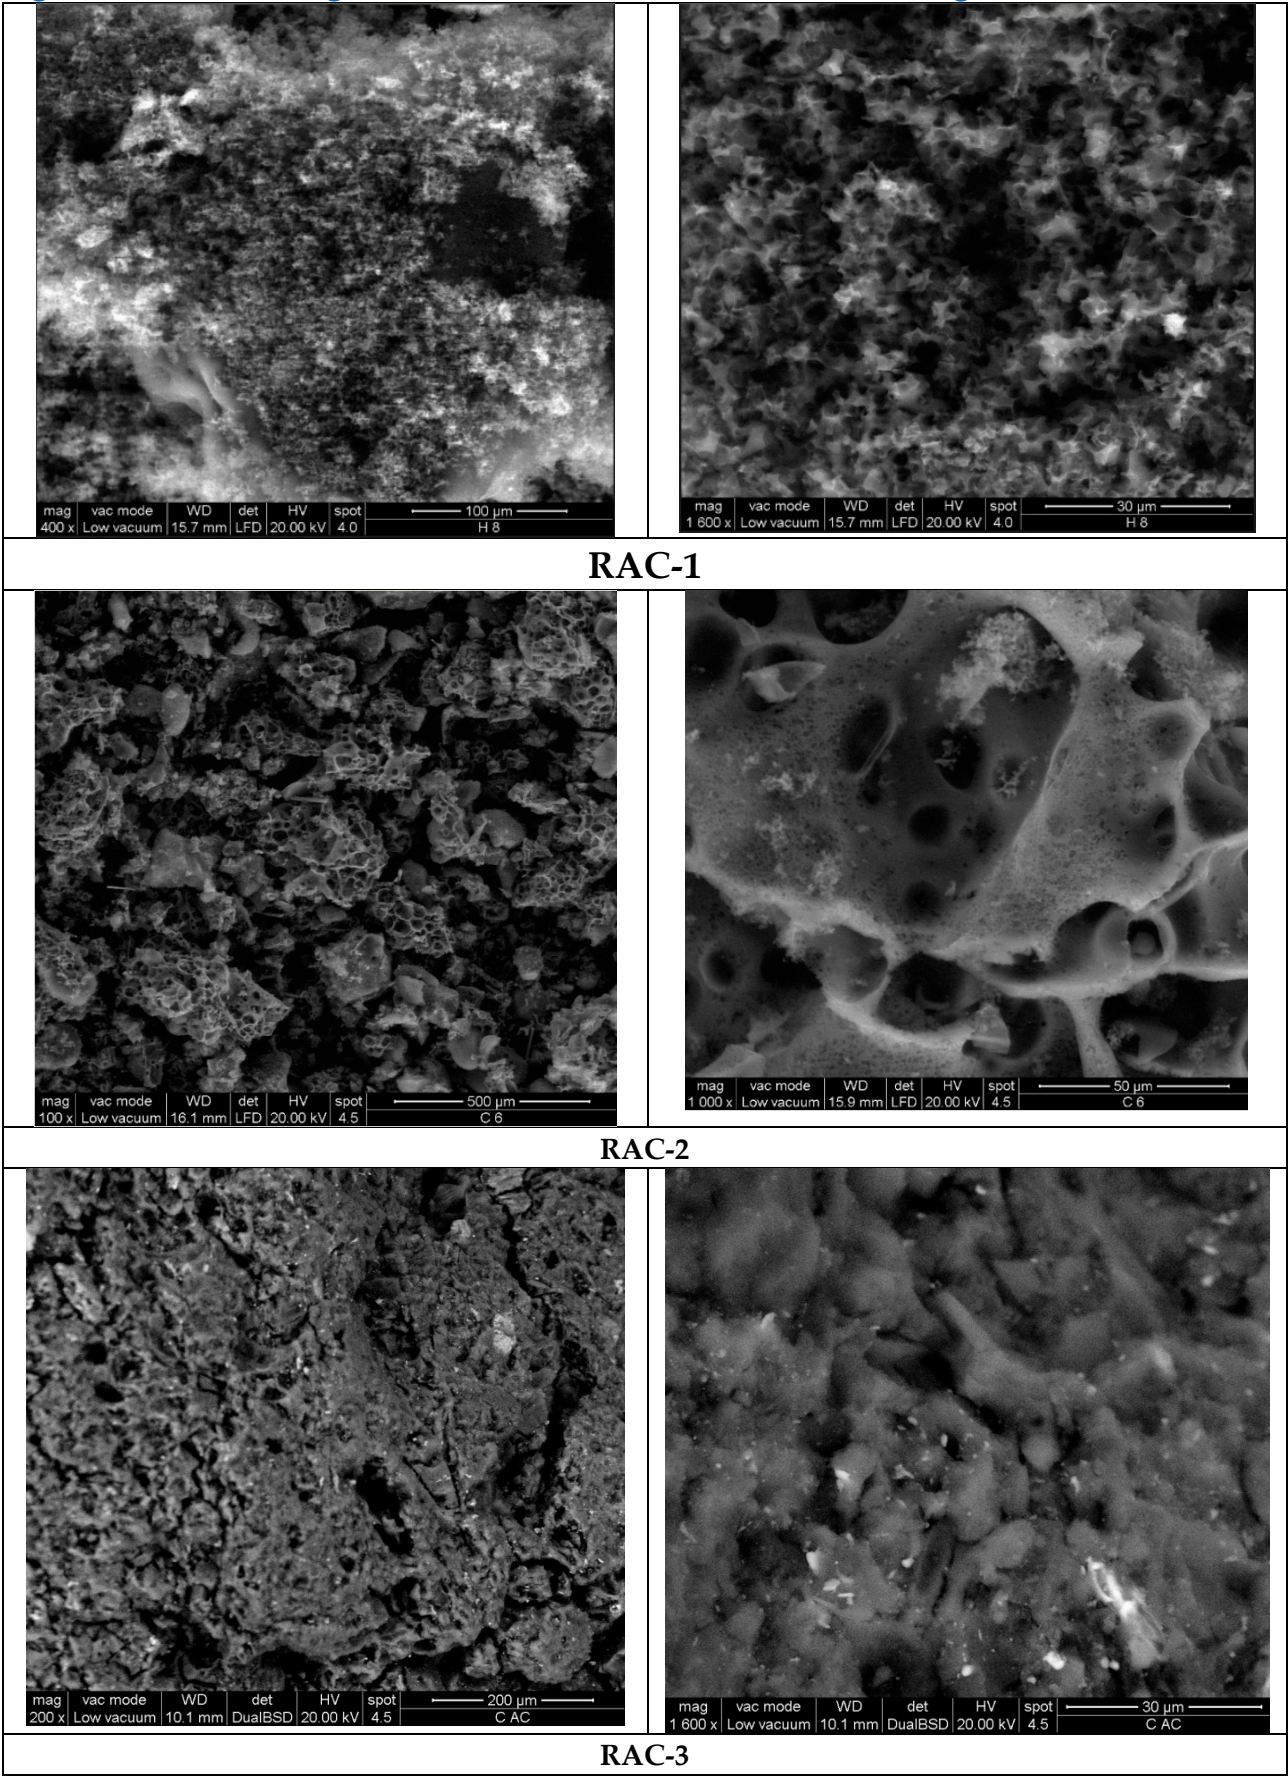



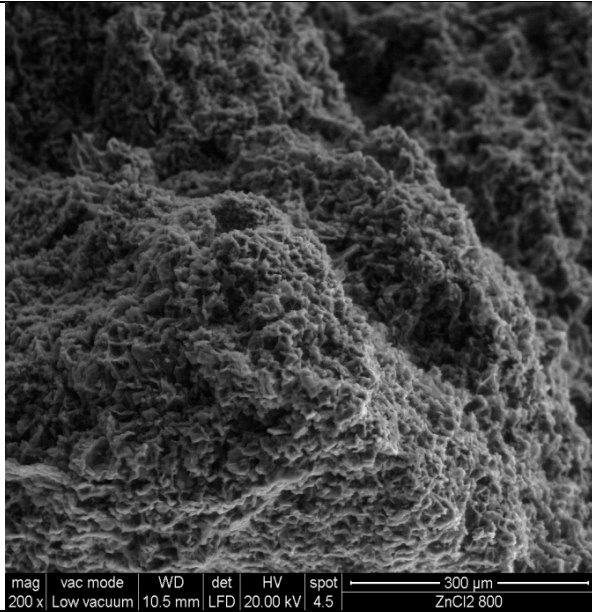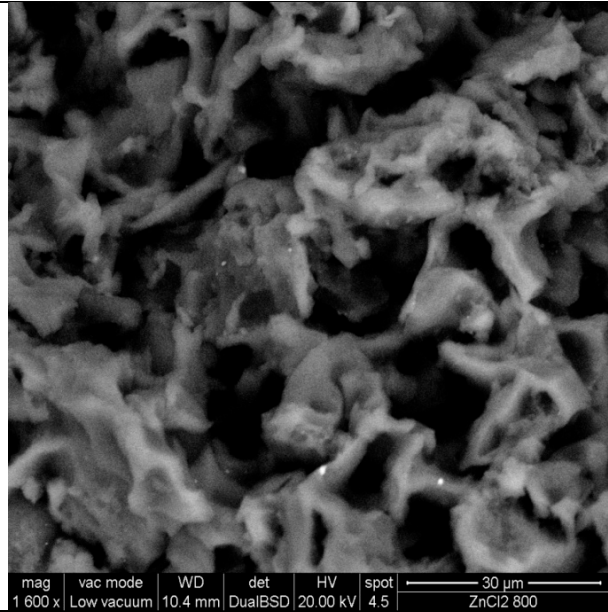

**RAC-4**

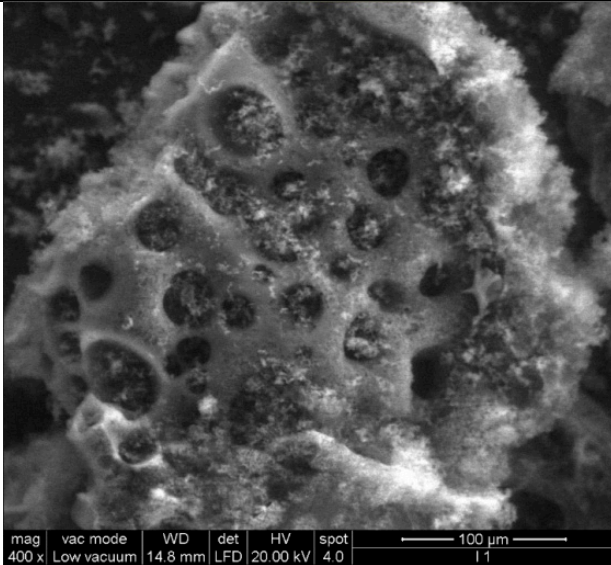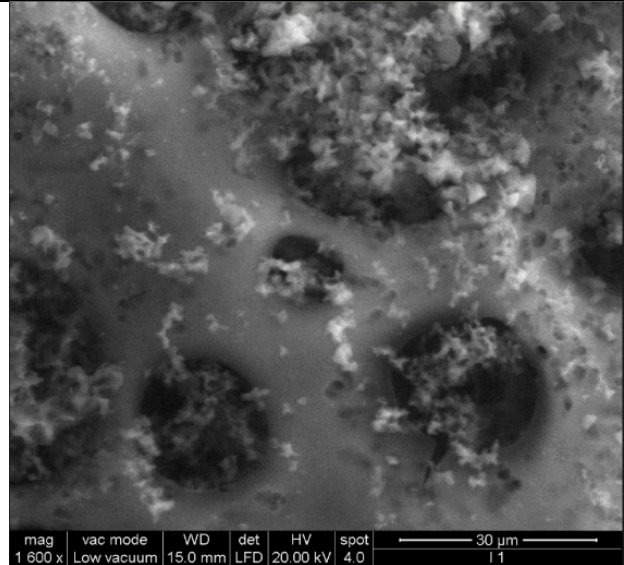

**AAC-1**

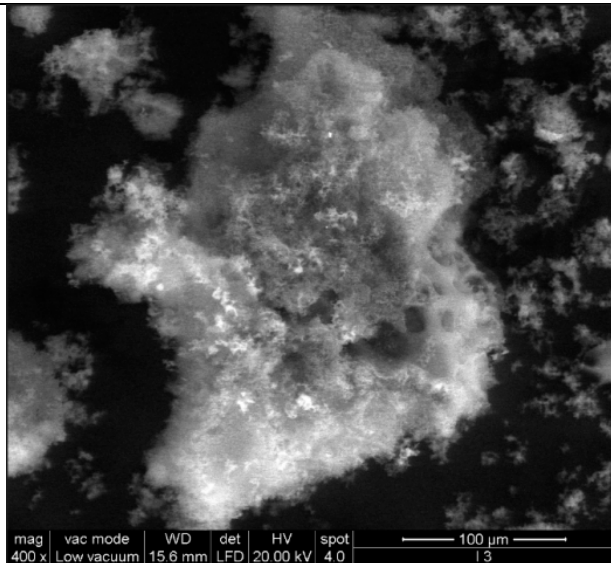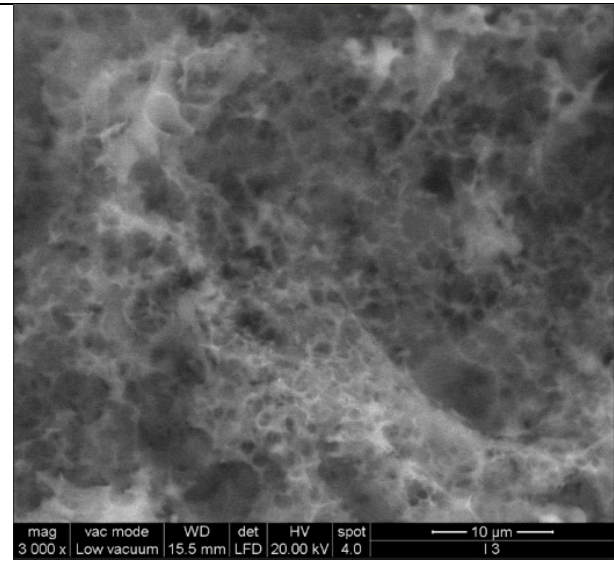

**AAC-2**



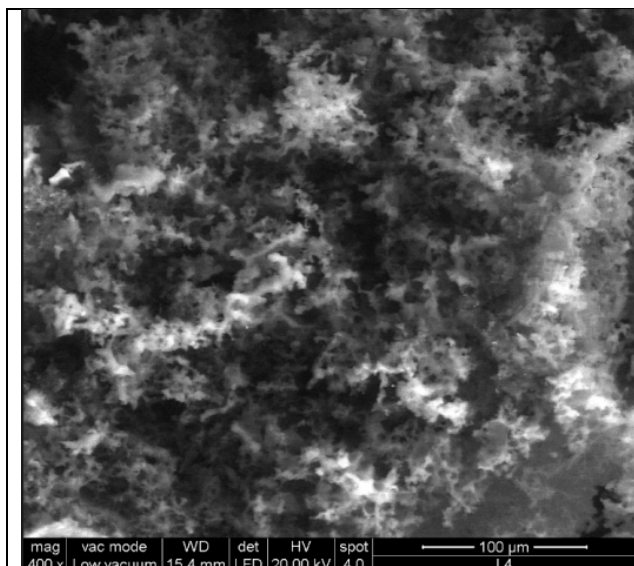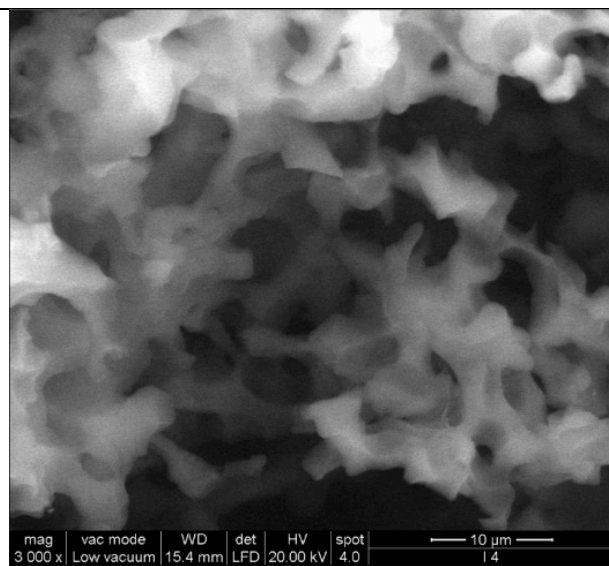

AAC-3

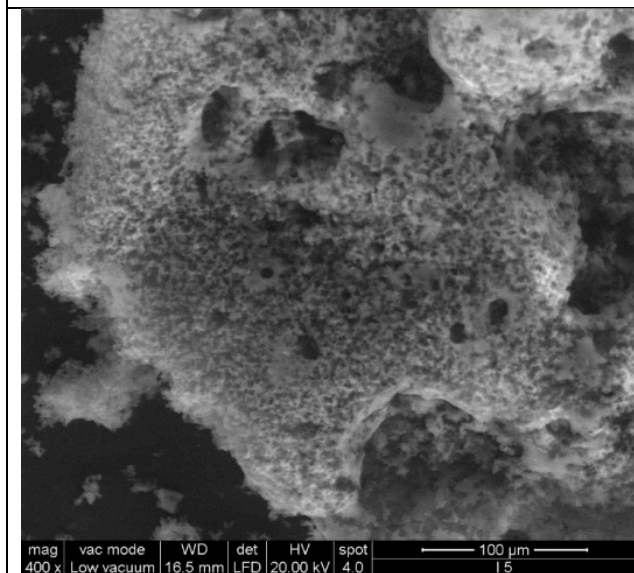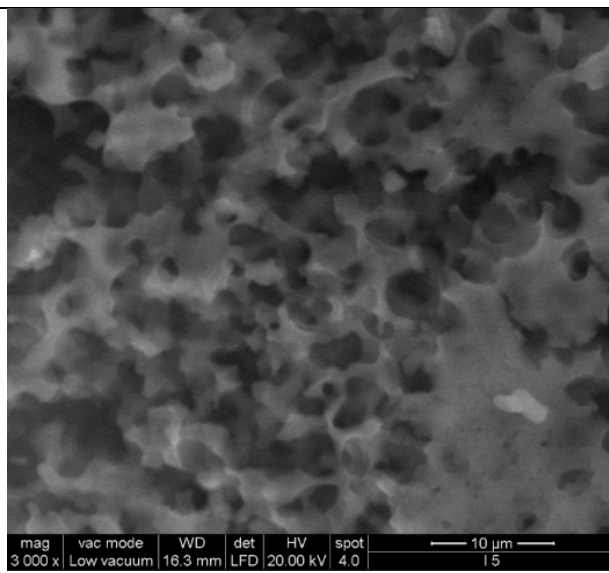

AAC-4

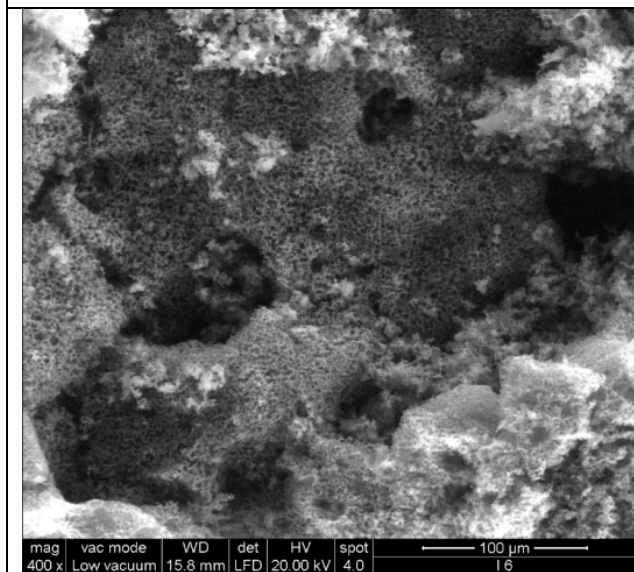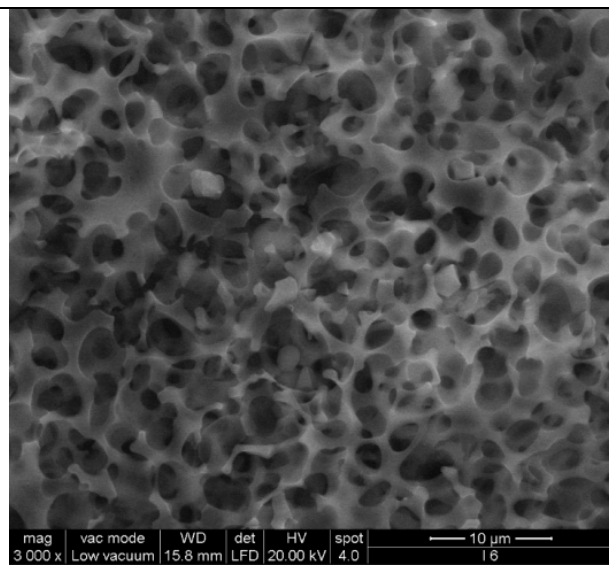

AAC-5

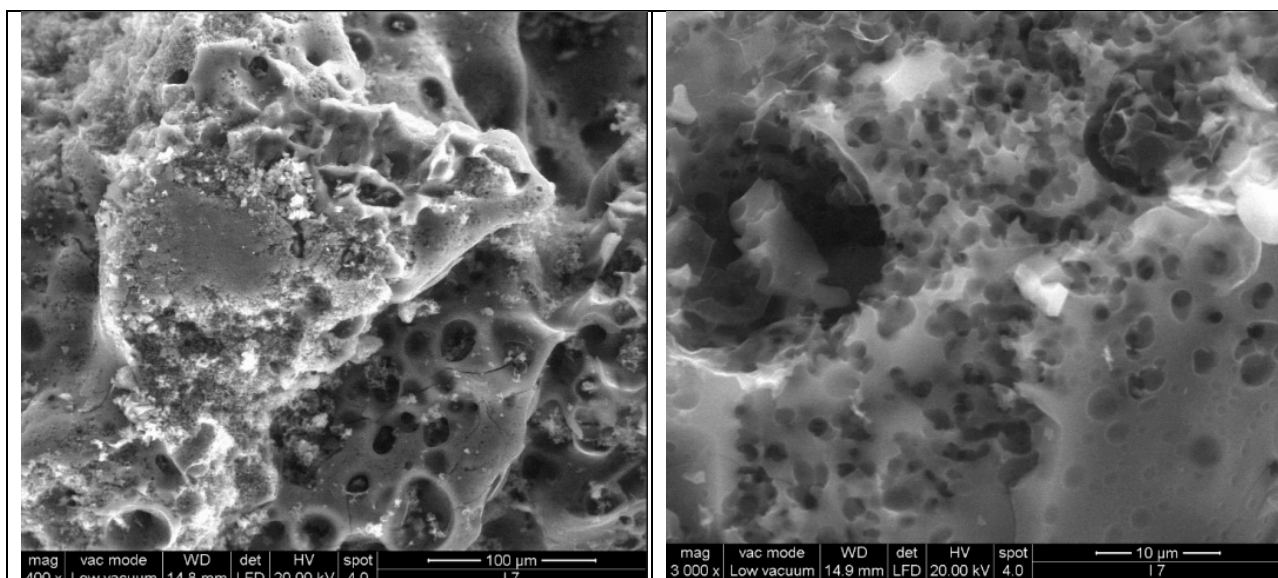

AAC-6

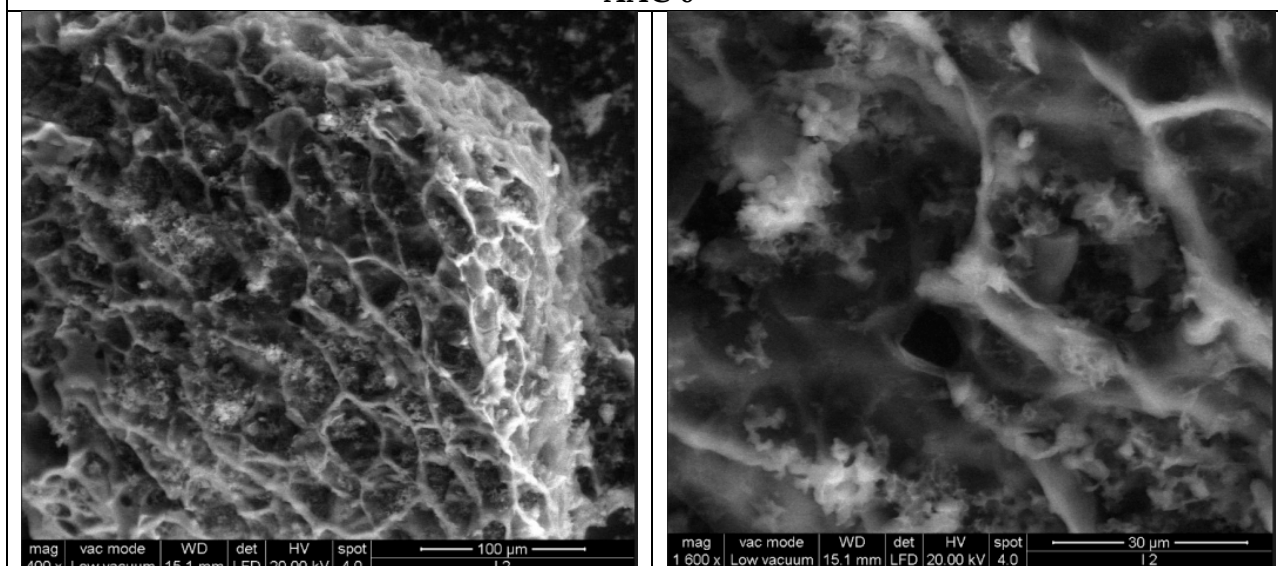

AAC-7

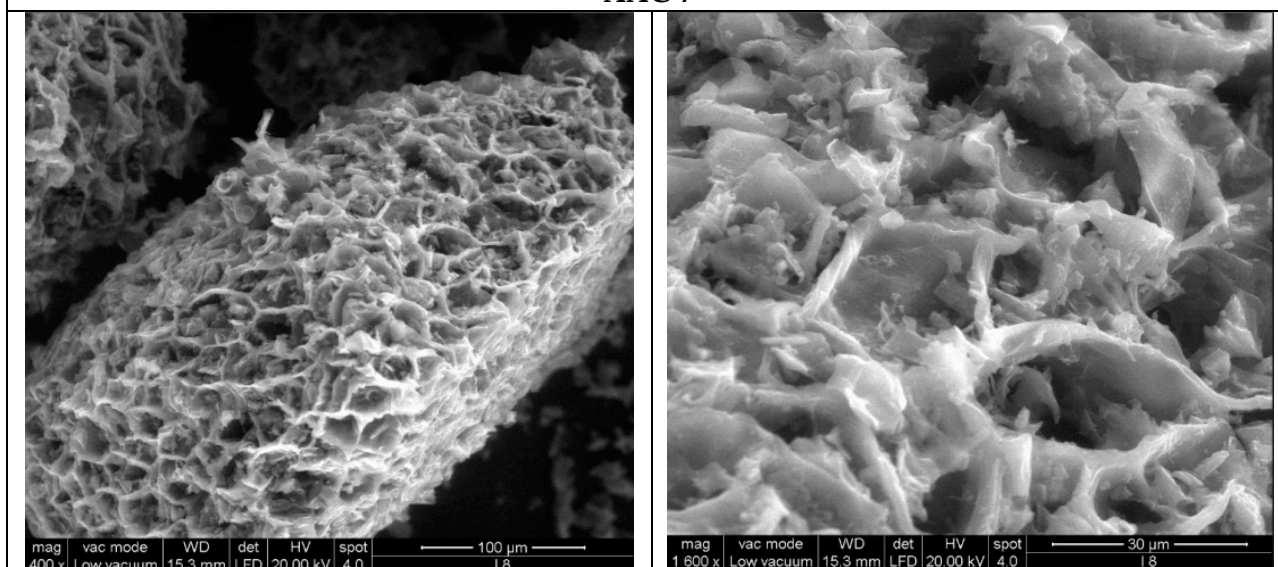

AAC-8



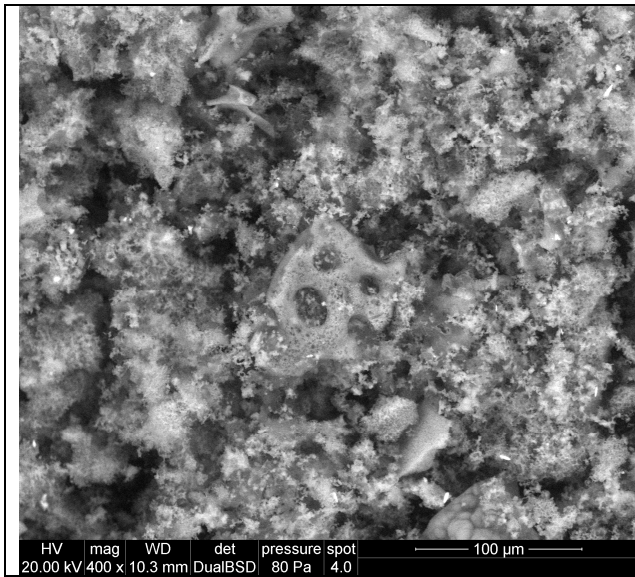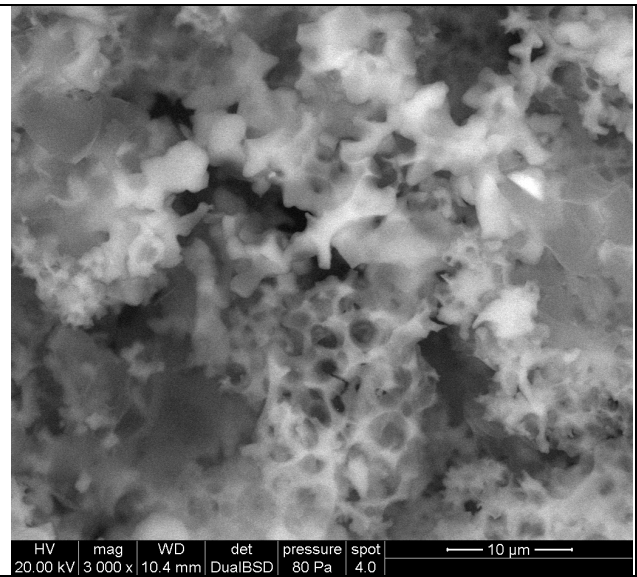

AAC-9

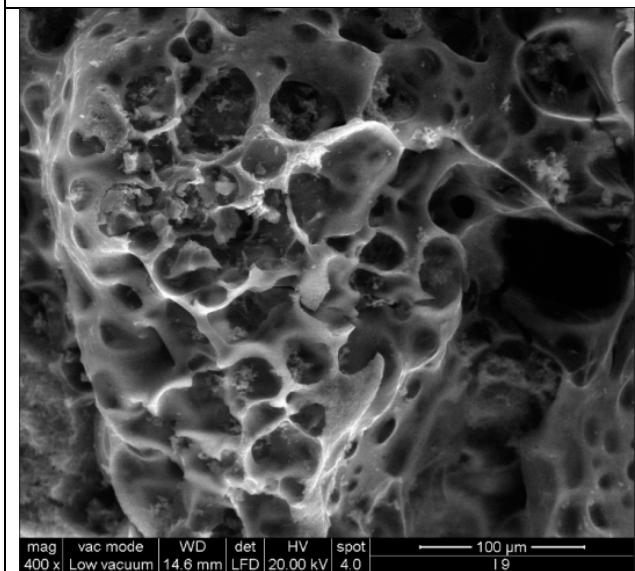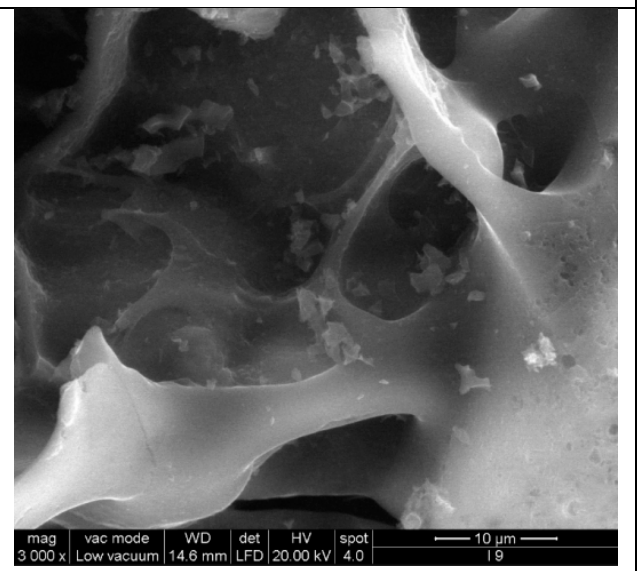

AAC-10

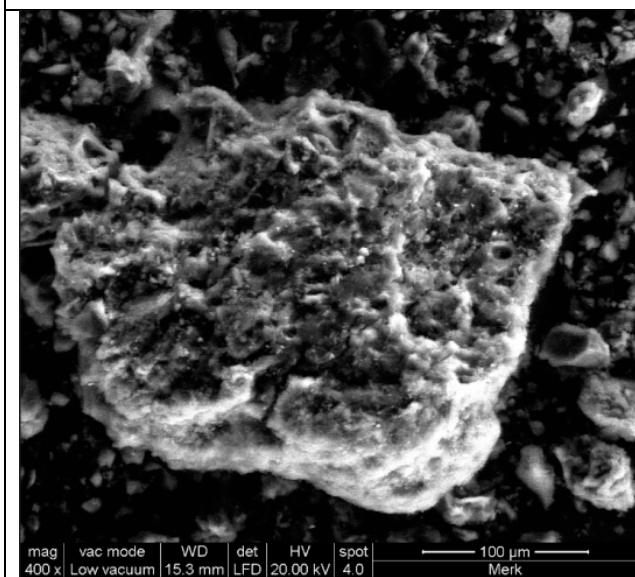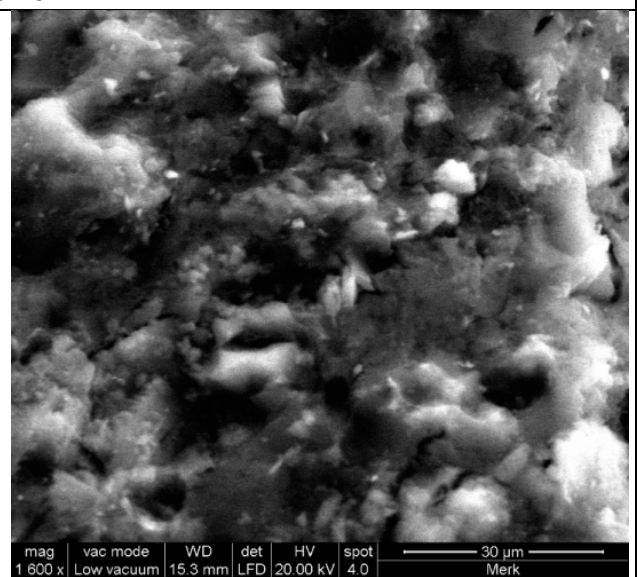

M

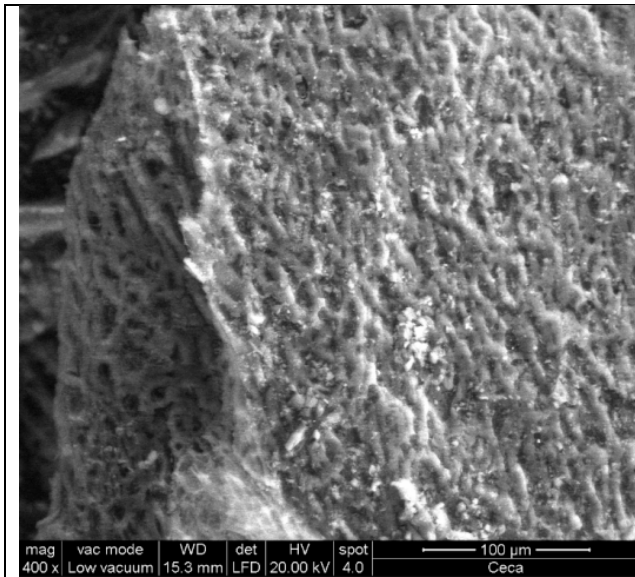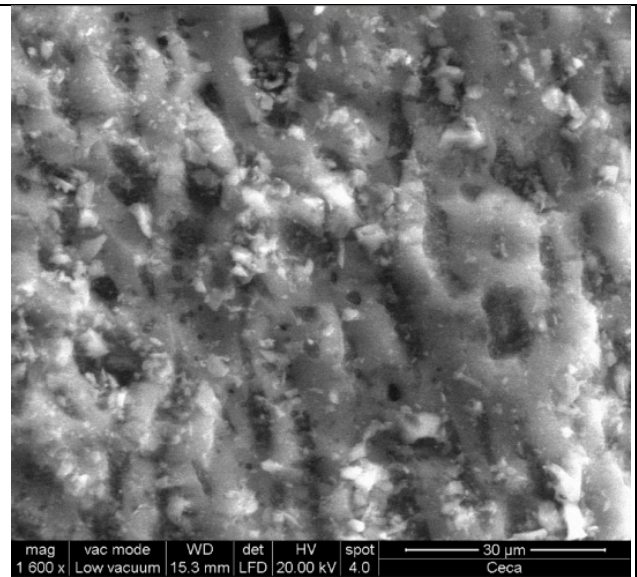

C

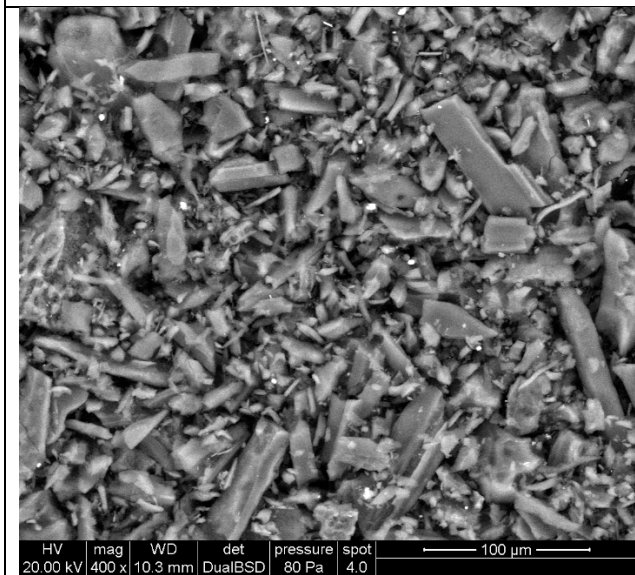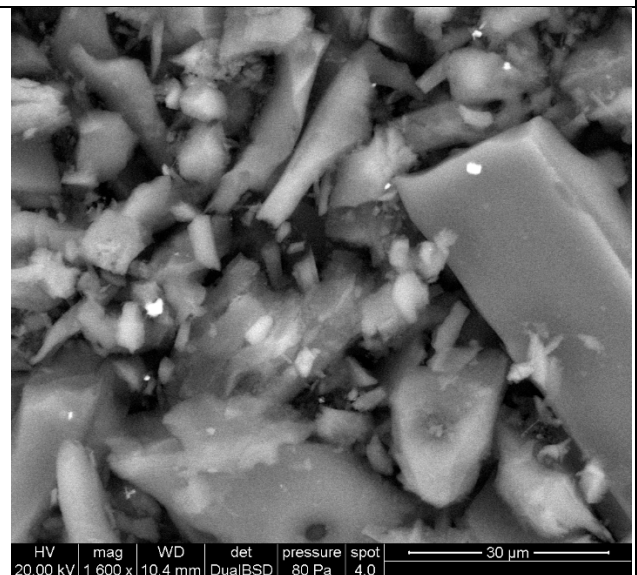

LP39



**Figure S12. TEM images of the samples AAC-5, AAC-6 and AAC-7, prepared by KOH activation at 600°C, 700°C, and 800°C, respectively.**

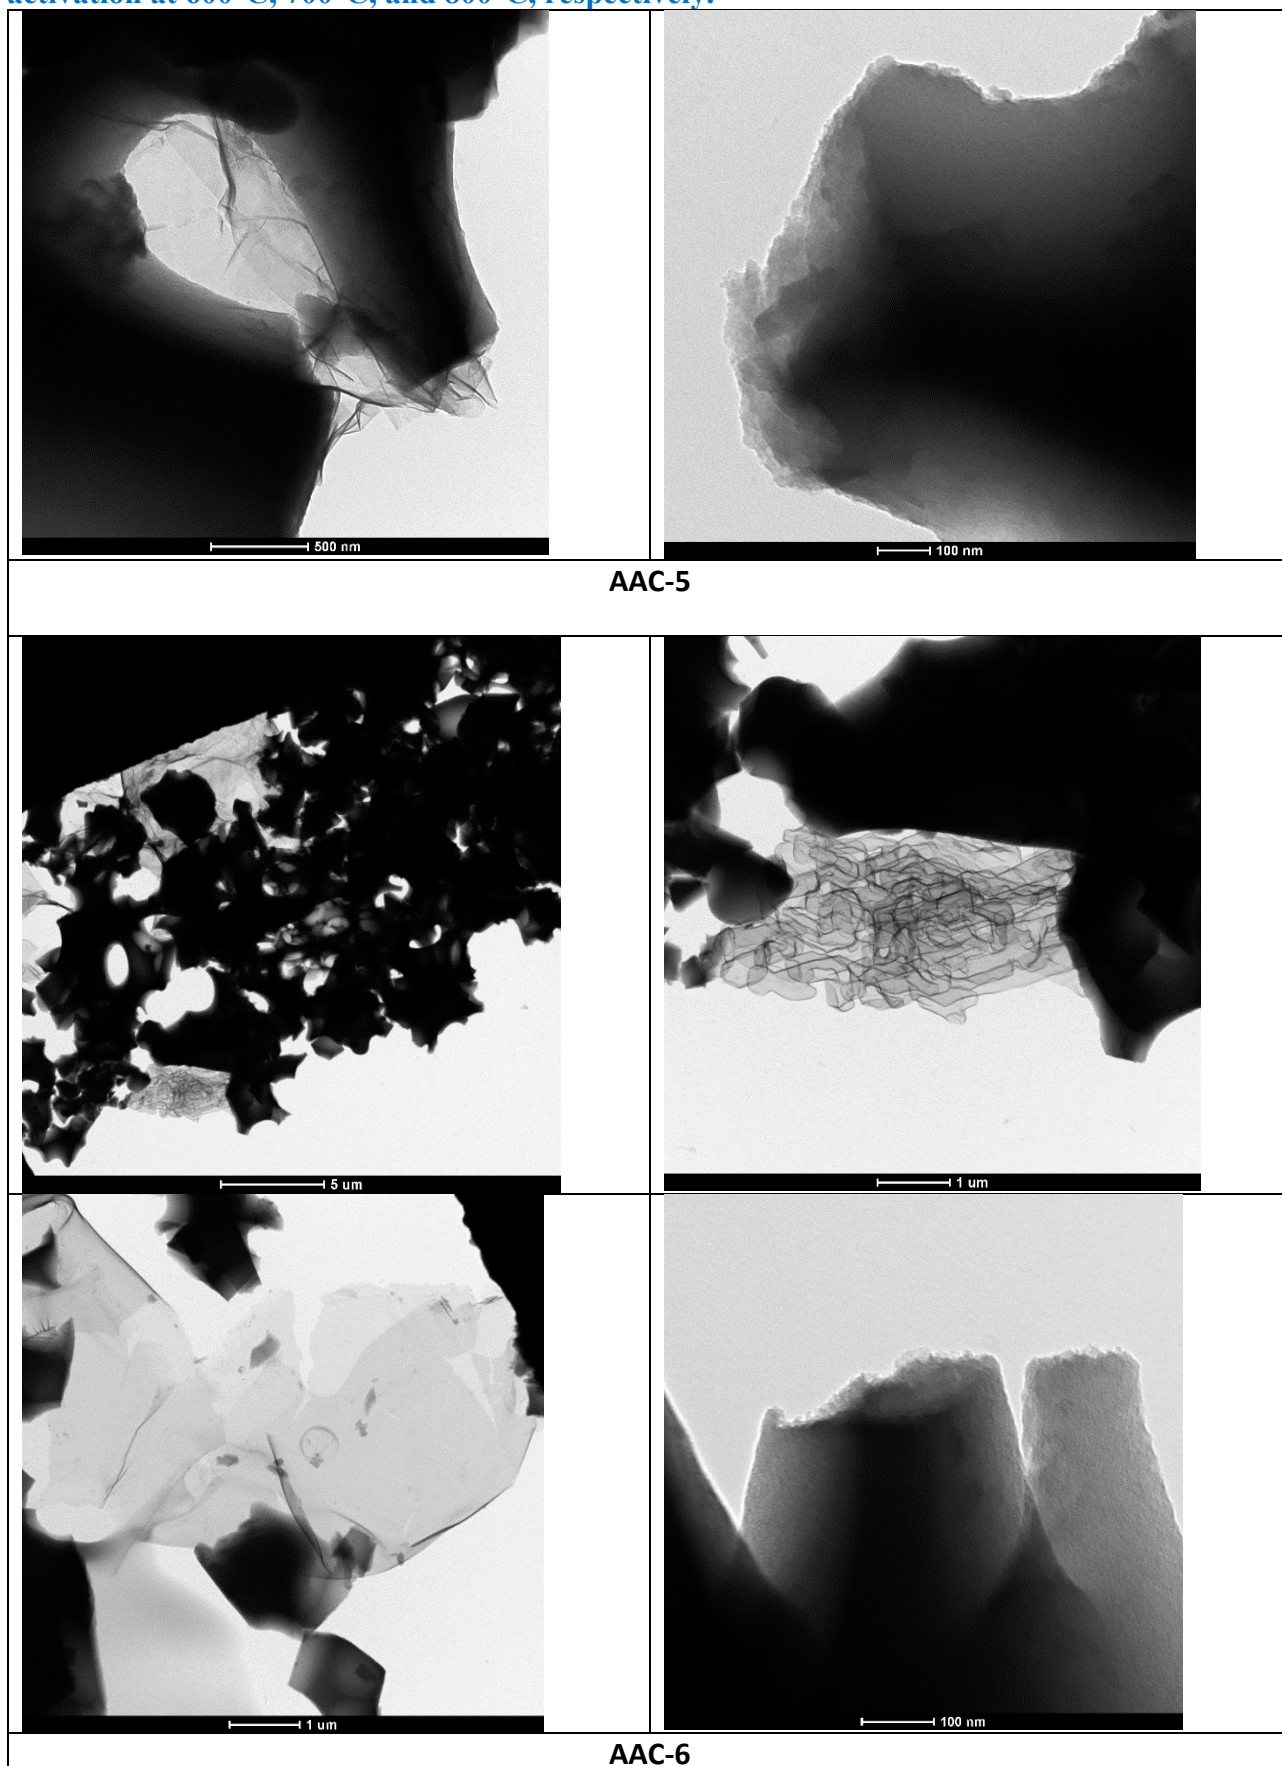

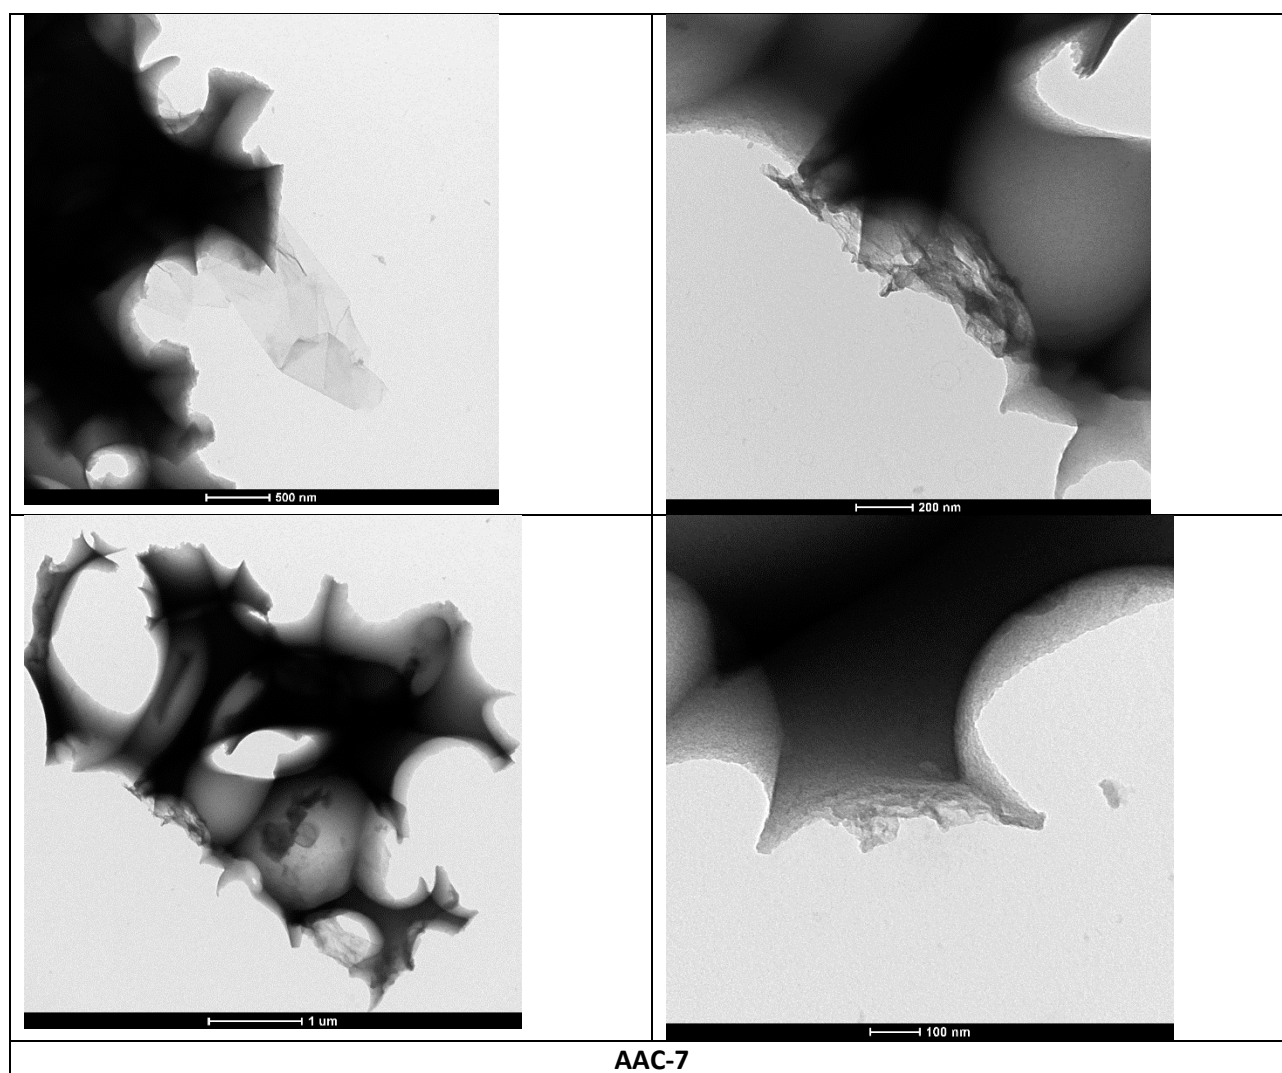

Figure S13. (a). Raman  $I_D/I_G$  ratio *vs* pore diameter for samples with BET values higher than 1000  $\text{m}^2/\text{g}$ . (b). Raman  $I_D/I_G$  ratio *vs* pore diameter for samples with BET values lower than 1000  $\text{m}^2/\text{g}$ .

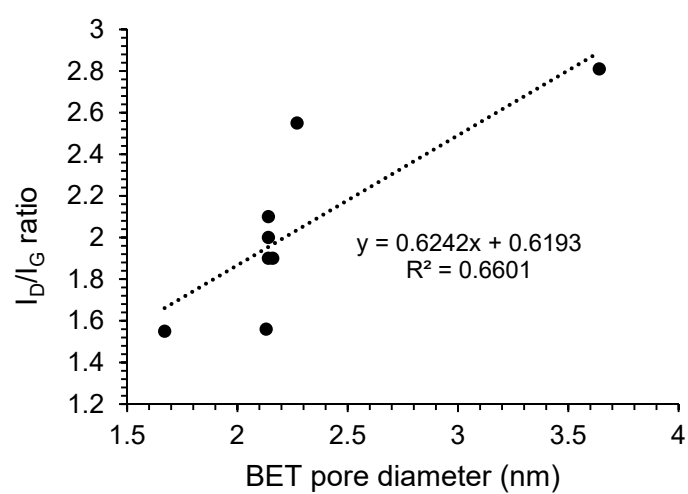



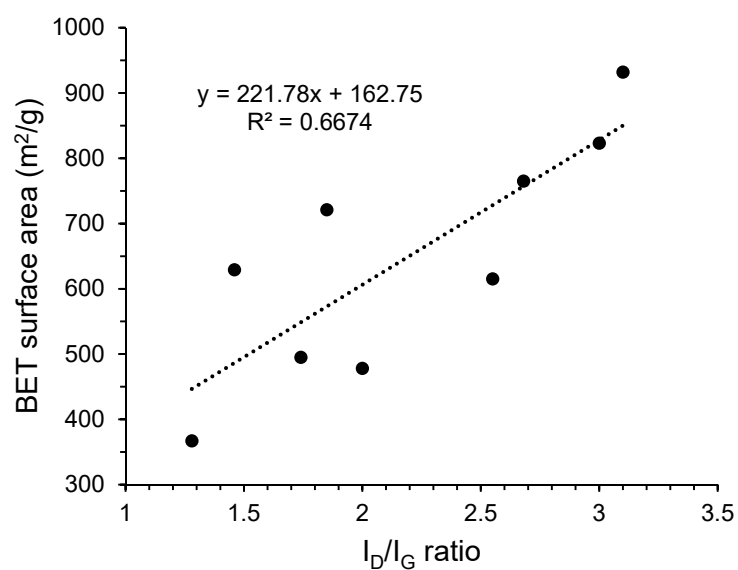

(b)

**Figure S14: Raman I<sub>D</sub>/I<sub>G</sub> ratio vs specific surface area for samples with BET values higher than 1000 m<sup>2</sup>/g.**

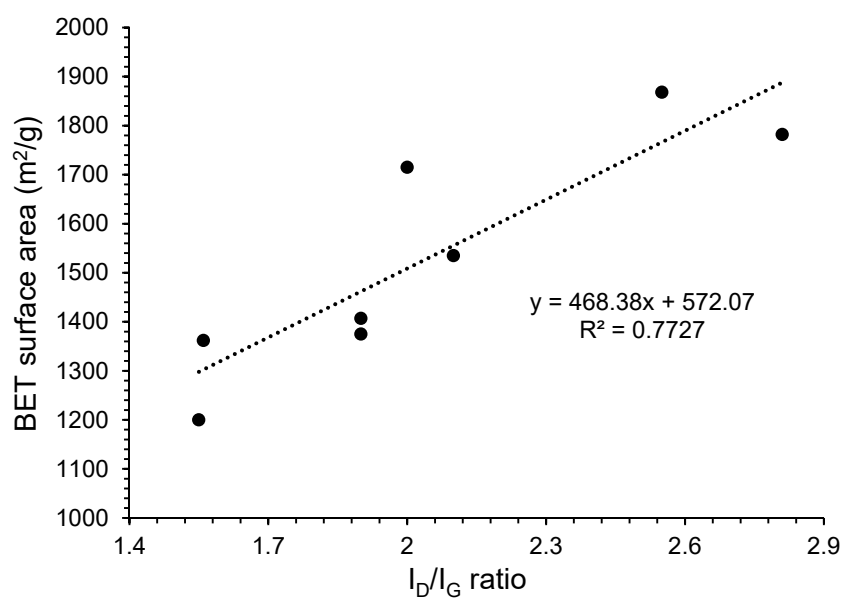

Supplement: s1 [file s1]
